# 1 **Single-cell transcriptomics defines heterogeneity of epicardial cells** 2 **and fibroblasts within the infarcted heart**

3 **Julia Hesse<sup>1,†</sup>, Christoph Owenier<sup>1,†</sup>, Tobias Lautwein<sup>2</sup>, Ria Zalfen<sup>1</sup>, Jonas F. Weber<sup>3</sup>,**  
4 **Zhaoping Ding<sup>1</sup>, Christina Alter<sup>1</sup>, Alexander Lang<sup>4</sup>, Maria Grandoch<sup>5</sup>, Norbert Gerdes<sup>4</sup>,**  
5 **Jens W. Fischer<sup>5</sup>, Gunnar W. Klau<sup>3</sup>, Christoph Dieterich<sup>6</sup>, Karl Köhrer<sup>2</sup>, Jürgen Schrader<sup>1,\*</sup>**

6 <sup>1</sup>Department of Molecular Cardiology, Medical Faculty, Heinrich Heine University Düsseldorf,  
7 Düsseldorf, Germany

8 <sup>2</sup>Biologisch-Medizinisches-Forschungszentrum (BMFZ), Genomics & Transcriptomics  
9 Laboratory, Heinrich Heine University Düsseldorf, Düsseldorf, Germany

10 <sup>3</sup>Algorithmic Bioinformatics, Heinrich Heine University Düsseldorf, Düsseldorf, Germany

11 <sup>4</sup>Division of Cardiology, Pulmonology and Vascular Medicine, Medical Faculty, Heinrich Heine  
12 University Düsseldorf, Düsseldorf, Germany

13 <sup>5</sup>Department of Pharmacology, Medical Faculty, Heinrich Heine University Düsseldorf,  
14 Düsseldorf, Germany

15 <sup>6</sup>Section of Bioinformatics and Systems Cardiology, Klaus Tschira Institute for Integrative  
16 Computational Cardiology and Department of Internal Medicine III, University Hospital  
17 Heidelberg, Heidelberg, Germany

18 <sup>†</sup>These authors contributed equally to this work.

19 <sup>\*</sup>Corresponding author. Email: [schrader@uni-duesseldorf.de](mailto:schrader@uni-duesseldorf.de)

20 Short title: Epicardial heterogeneity of the adult heart

## 21 Correspondence:

22 Jürgen Schrader, MD

23 Department of Molecular Cardiology

24 Heinrich Heine University Düsseldorf

25 Universitätsstr. 1

26 40225 Düsseldorf

27 Phone: +49 (211) 81 10527

28 Fax: +49 (211) 81 15210

29 E-Mail: [schrader@uni-duesseldorf.de](mailto:schrader@uni-duesseldorf.de)

30 **Abstract**

31 In the adult heart, the epicardium becomes activated after injury, contributing to cardiac healing  
32 by secretion of paracrine factors. Here we analyzed by single-cell RNA sequencing combined with  
33 RNA in situ hybridization and lineage tracing of WT1<sup>+</sup> cells the cellular composition, location,  
34 and hierarchy of epicardial stromal cells (EpiSC) in comparison to activated myocardial  
35 fibroblasts/stromal cells in infarcted mouse hearts. We identified 11 transcriptionally distinct  
36 EpiSC populations, that can be classified in three groups each containing a cluster of proliferating  
37 cells. Two groups expressed cardiac specification makers and sarcomeric proteins suggestive of  
38 cardiomyogenic potential. Transcripts of HIF-1 $\alpha$  and HIF-responsive genes were enriched in  
39 EpiSC consistent with an epicardial hypoxic niche. Expression of paracrine factors was not limited  
40 to WT1<sup>+</sup> cells but was a general feature of activated cardiac stromal cells. Our findings provide  
41 the cellular framework by which myocardial ischemia may trigger in EpiSC the formation of  
42 cardioprotective/regenerative responses.

## 43 **Introduction**

44 Myocardial infarction (MI), still the most frequent cause of death in western societies, is associated  
45 with massive activation of cardiac fibroblasts, ultimately resulting in excessive accumulation of  
46 extracellular matrix (ECM) components that finally impair cardiac function (1). During  
47 development, the majority of cardiac fibroblasts are derived from the epicardium which forms the  
48 thin outermost epithelial layer of all vertebrate hearts and exhibits extensive developmental  
49 plasticity (2). A subset of epicardial cells undergoes epithelial to mesenchymal transition (EMT)  
50 and those epicardial progenitor cells can give rise to various cardiac cell types. In addition to  
51 cardiac fibroblasts, this includes vascular smooth muscle cells and pericytes which contribute to  
52 the coronary vasculature (2). Embryonic epicardial heterogeneity was recently studied at the  
53 single-cell level in the developing zebrafish heart and uncovered three epicardial populations,  
54 functionally related to cell adhesion, migration and chemotaxis (3).

55  
56 In the adult heart, the epicardium is a rather quiescent monolayer that becomes activated after MI  
57 by upregulating embryonic epicardial genes (4,5). In the injured heart, epicardial cells form via  
58 EMT a multi-cell layer of epicardial stromal cells (EpiSC) at the heart surface that can reach a  
59 thickness of about 50-70  $\mu\text{m}$  in mice (6). It is generally assumed that the activated epicardium  
60 recapitulates the embryonic program in generating mesenchymal progenitor cells, although there  
61 may be major molecular differences with respect to their embryonic counterpart (7). On the  
62 functional side, adult EpiSC secrete paracrine factors that stimulate cardiomyocyte growth and  
63 angiogenesis (8) and play a key role in post-MI adaptive immune regulation (9). When stimulated  
64 with thymosin  $\beta_4$ , Wilms tumor protein 1-positive (WT1<sup>+</sup>) adult EpiSC can form cardiomyocytes,  
65 however, the rate of conversion is only small (10). Thus, the epicardium is a signaling center  
66 regulating cardiac wound healing and may have cardiogenic potential in the adult injured heart.

67  
68 Despite its importance in cardiac repair, little is known on cell heterogeneity and molecular  
69 identifiers within the epicardial layer of the adult heart. Yet, this knowledge is essential to map the  
70 epicardial progeny and attribute meaningful functions. While the single-cell landscape of activated  
71 cardiac fibroblasts (activated cardiac stromal cells, aCSC) in the post-MI heart has been explored  
72 in detail (11,12), these studies did not assess epicardial heterogeneity because of lack of specific  
73 identifiers. In a previous study we have reported a novel perfusion-based technique (13) which  
74 permitted the simultaneous isolation of EpiSC and aCSC with high yield and only minimal cell  
75 activation. The isolation of viable, purified preparations of aCSC and EpiSC from the infarcted  
76 heart permitted the first direct comparison of the two cardiac stromal cell fractions. We have  
77 combined single-cell RNA sequencing (scRNAseq) with lineage tracing of WT1-expressing cells  
78 and localization of cell populations by RNA *in situ* hybridization, characterized cellular hierarchy  
79 of adult EpiSC, defined similarities and differences to cardiac fibroblast, and explored in detail the  
80 individual EpiSC populations in the activated epicardium.

## 81 Results

### 82 ScRNAseq of post-MI stromal cells

83 EpiSC (epicardial stromal cells) and aCSC (activated cardiac stromal cells) were isolated from the  
84 same mouse hearts (n=3) 5 days after MI (50 min ischemia followed by reperfusion) using a  
85 technique which rather selectively removed EpiSC by applying gentle shear force to the cardiac  
86 surface (13) (Figure 1A). CSC (cardiac stromal cells) were isolated from uninjured hearts of sham-  
87 operated animals (n=3). Cell preparations were depleted of cardiomyocytes, endothelial cells and  
88 immune cells (see methods) prior to scRNAseq using the 10x Genomics Chromium platform.  
89 Transcriptional profiles of 13,796 EpiSC, 24,470 aCSC and 24,781 CSC were captured after  
90 quality control filtering. Unbiased clustering using the Seurat R package with visualization in  
91 UMAP dimension reduction plots was performed to identify cells with distinct lineage identities  
92 and transcriptional profiles. Average and significantly enriched RNA expression of EpiSC, aCSC  
93 and CSC are listed in Supplementary files 1 and 2, respectively.

### 94 Characterization of EpiSC populations

95 As shown in Figure 1B, we identified 11 transcriptionally different cell populations within the  
96 EpiSC fraction. Cell doublets with hybrid transcriptomes identified by DoubletFinder (16)  
97 (Figure 1—figure supplement 1A) and minor non-stromal cell populations such as cardiomyocytes  
98 and erythrocytes, identified according to cell type-specific marker expression (Figure 1—figure  
99 supplement 1B), were excluded from further analysis. EpiSC populations varied in size (Figure  
100 1C), were hierarchically structured (Figure 1D) and showed over-representations of distinct GO  
101 biological process terms (Figure 1E). The top 5 most differentially expressed genes within each  
102 population are displayed in Figure 1F. Remarkably, transcripts of epithelial cell-associated genes  
103 and established epicardial genes (23) were enriched in both EpiSC-1 (*Dmkn*, *Saa3*) and EpiSC-7  
104 (*Msln*, *Krt7*, *Krt18*, *Krt19*, *Lgals7*), while mesenchymal marker genes were primarily expressed in  
105 EpiSC-3 (*Gsn*, *Pi16*) and EpiSC-4 (*Cd44*, *Ly6a*). Genes coding for ECM proteins were highly  
106 expressed in EpiSC-2 (*Spp1*), EpiSC-3 (*Smoc2*, *Sparcl1*), EpiSC-5 (*Clec3b*), EpiSC-6 (*Mfap4*,  
107 *Eln*) and EpiSC-8 (*Col5a3*, *Tnc*). Genes encoding contractile proteins were preferentially  
108 expressed in EpiSC-2 (*Acta2*, *Myl9*, *Tagln*). Wnt pathway-associated gene transcripts were  
109 enriched in EpiSC-6 (*Sfrp2*) and EpiSC-10 (*Wif1*, *Dkk3*). Genes related to the cellular response to  
110 interferon characterized EpiSC-11 (*Ifit1*, *Ifit3* and *Ifit3b*, *Cxcl10*). Finally, expression of genes  
111 associated with high cell cycle activity and mitosis was a feature of EpiSC-9 (*Pbk*, *Top2a*, *Prc1*,  
112 *Stmn1*, *Ube2c*).

### 113 Epicardial marker gene expression

114 The cellular distribution of well-established epicardial progenitor marker genes such as *Wtl*,  
115 *Tbx18*, *Sema3d*, *Aldh1a2*, *Gata5* and *Tcf21* (2) is shown in Figure 2A. *Wtl*, commonly used for  
116 lineage tracing studies (4), was found to be highly enriched in EpiSC populations 1, 7 and 8, which

117 are adjacent to each other (Figure 1B). *Tbx18*, on the other hand, was broadly distributed in  
118 populations 1, 2, 4, 7, 8, 9 and 11 (Figure 2A). *Sema3d* was predominantly expressed in EpiSC-7,  
119 while *Aldh1a2* mainly resides in EpiSC populations 1, 3, 7 and 9. *Tcf21* again was broadly  
120 expressed showing no overlap with *Wtl*-expressing clusters.

121  
122 Since cells in EpiSC-1 showed substantial inhomogeneity of markers (Figure 2A), we carried out  
123 a separate clustering analysis for EpiSC-1 including the adjacent two *Wtl*-expressing populations  
124 EpiSC-7 and 8. We identified 5 subclusters in EpiSC-1 (EpiSC-1.1, 1.2, 1.3, 1.4, 1.5), with no  
125 subclustering in EpiSC-7 and 8 (Figure 2—figure supplement 1A-C). EpiSC1.4 is characterized  
126 by expression of cell cycle-associated genes (*Rrm2*, *Pclaf*, *Hist1h2ap*, *Hmgb2*, *Ube2c*, *Top2a*),  
127 indicating proliferating cells (Figure 2—figure supplement 1D; Supplementary files 3 and 4).  
128 EpiSC1.5 showed enriched expression of genes encoding core ribosomal proteins such as *Rps21*  
129 and *Rpl37a*, suggesting high protein synthesis activity.

130  
131 We also searched for expression of *Tgm2*, *Sema3f* and *Cxcl12*, which were recently found to mark  
132 three functional different epicardial populations in the developing zebrafish heart (3). We found  
133 *Tgm2* and *Sema3f* preferentially expressed in *Wtl*-expressing EpiSC-1 and 7 (Figure 2—figure  
134 supplement 2A-B). However, *Mylk*, which is an additional marker of the *Sema3f*-expressing  
135 zebrafish epicardial population (3), was primarily expressed in EpiSC-8. *Cxcl12*, present only in a  
136 small cell population in the zebrafish (3), was rather broadly expressed with enrichment in EpiSC-  
137 2 and subcluster EpiSC-1.1 (Figure 2—figure supplement 2C-D). These findings demonstrate  
138 some degree of evolutionary preservation in epicardial populations from zebrafish to mice, but  
139 also reveal considerable differences in marker gene expression pattern and population sizes.

#### 140 **Spatial RNA expression of EpiSC population identifiers**

141 To explore the specific location of EpiSC populations in the infarcted heart, RNA *in situ*  
142 hybridization of gene transcripts for selected EpiSC populations was carried out (Figure 2B upper  
143 panel), using population-specific identifiers (Figure 2B lower panel). *Msln* expression (EpiSC-7)  
144 was detected on the outer part of the epicardium, consistent with the epithelial signature of EpiSC-  
145 7. Expression of *Wtl* (EpiSC-7, 1, 8) and *Cd44* (EpiSC-4) also labelled cells that were localized  
146 on the outer layer. In contrast, *Sfrp2* expression (EpiSC-6) was rather homogeneously dispersed  
147 throughout the epicardium and was also detected in the myocardium, labelling aCSC. A similar  
148 distribution pattern was observed for *Pcsk6* (EpiSC-3), *Top2a* (EpiSC-9; subpopulations of EpiSC-  
149 1, EpiSC-2) and *Dkk3* (EpiSC-10). In summary, we confirmed that major populations identified  
150 by scRNAseq localize to the activated post-MI epicardium.

#### 151 **Cardiomyogenesis, paracrine factors and HIF-1-responsive genes**

152 Lineage tracing experiments have shown that cardiomyogenesis can be initiated *in vivo* in *Wtl*<sup>+</sup>  
153 epicardial cells when stimulated with thymosin  $\beta$ 4 (10). We found thymosin  $\beta$ 4 (*Tmsb4x*) and

154 BRG1 (*Smarca4*), a transcription activator for WT1 (24), to be co-expressed within the *Wtl*-  
155 expressing EpiSC-8 (Figure 2C). Interestingly, many key cardiogenic factors were also expressed  
156 within the *Wtl*-expressing EpiSC populations (Figure 2C, cardiogenic factors I). This includes  
157 MESP1 which marks early cardiovascular progenitor specification (25), as well as WNT11, ISL1,  
158 TBX5 and GATA4, 5, and 6 which all play a critical role in heart development (26,27).  
159 Surprisingly, several *Hox* family members (Figure 2C) were expressed in EpiSC-8. HOX  
160 transcription factors are downstream effectors of retinoic acid signaling (28) that is required for  
161 differentiation of cardiac progenitors during heart development (29). Intriguingly, a second set of  
162 cardiogenic factors was found in EpiSC-3, 5, 6, 9 and 10 (Figure 2C, cardiogenic factors II). This  
163 includes Nkx-2.5 as well as BMP2 and BMP4 the latter of which are crucial in the regulation of  
164 Nkx-2.5 expression and specification of the cardiac lineage (30). In addition, we found low  
165 expression of genes encoding muscle structural proteins such as *Myl2*, 4, and 6, *Tnnt2*, *Ttn* and  
166 *Neb1* which appear to be present especially in EpiSC-7 and EpiSC-9 (Figure 2C, contractile  
167 proteins). The highest expression levels of Notch target genes were found in *Wtl*-negative EpiSC  
168 populations, especially EpiSC-10 (Figure 2C). This is remarkable, since Notch-activated  
169 epicardial-derived WT1<sup>+</sup> cells were described as a multipotent cell population with the ability to  
170 express cardiac genes (31). The observation that EpiSC-7 and 9 express cardiac specification  
171 markers and sarcomere proteins is suggestive that these populations have cardiomyogenic  
172 potential.

173 Epicardial cells have been reported to secrete numerous paracrine factors that can modulate  
174 myocardial injury in the mouse heart (8). In line with this observation, we found several  
175 chemokines (MCP-1, *Ccl2*; MIP-1 $\beta$ , *Ccl4*; RANTES, *Ccl5*; MCP-2, *Ccl8*) known to be involved  
176 in monocyte recruitment to be primarily expressed in EpiSC-11 (Figure 2D). EpiSC-11 also  
177 showed strongly enriched expression of IP-10 (*Cxcl10*, top 5 marker gene) which is involved in  
178 triggering anti-fibrotic effects after MI (32). Expression of chemokines involved in neutrophil  
179 granulocyte recruitment (GRO- $\alpha$ ,  $\beta$ ,  $\gamma$ , *Cxcl1*, 2, 3; ENA-78, *Cxcl5*; NAP-2/CXCL-7, *Ppbb*) was  
180 preferentially found in EpiSC-2 and 4 but also in EpiSC-1 and 7. Expression of SDF-1 (*Cxcl12*),  
181 known to reduce scar size when administered to the damaged heart (33), was enriched in EpiSC-  
182 2.

183 Expression of proangiogenic factors previously identified in the supernatant of WT1<sup>+</sup> epicardial  
184 cells (8), such as Angiopoietin-1 (*Angpt1*), FGF2, IL-6, VEGFA and VEGFC, was not limited to  
185 the *Wtl*-expressing EpiSC populations but pertained to other identified EpiSC populations (Figure  
186 2E). The most highly expressed paracrine factors were TGF- $\beta$ 1 which attenuates myocardial  
187 ischemia-reperfusion injury (34), IGF-1 which prevents long-term left ventricular remodeling after  
188 cardiac injury (35) and MYDGF which mediates ischemic tissue repair (36).

189 A hypoxia-responsive element in the *Wtl* promotor was reported to bind HIF-1 $\alpha$  that is required  
190 for WT1 induction (37). We found expression of *Hif1a* and HIF-1-responsive genes, particularly  
191 those encoding glycolytic enzymes, to be enriched in multiple EpiSC populations (Figure 2F).

## 192 **Post-MI aCSC in comparison to EpiSC**

193 Clustering analysis of aCSC revealed 11 transcriptionally different populations (Figure 3A,  
194 Figure 3—figure supplement 1A-C). Again, cell doublets with hybrid transcriptomes identified by  
195 DoubletFinder (16) (Figure 3—figure supplement 2A) and minor non-stromal cell populations  
196 (Figure 3—figure supplement 2B) were excluded from further analysis. The top 5 most  
197 differentially expressed genes in aCSC are displayed Figure 3—figure supplement 1D. Genes  
198 encoding ECM proteins were associated with aCSC-1 (*Eln*, *Wisp2*), aCSC-2 (*Thbs4*, *Cilp*), aCSC-  
199 4 (*Smoc2*, *Sparcl1*). Cell populations with similar gene signature were recently termed activated  
200 fibroblasts (11) or late response fibroblasts and matrifibrocytes (12). In these studies, a population  
201 similar to aCSC-5 was either referred to as *Scal*-low or homeostatic epicardial-derived fibroblasts  
202 (11,12). aCSC-6 preferentially expressed genes characteristic of epithelial cells (*Lgals7*, *Dmkn*,  
203 *Msln*). Because this epithelial signature was comparable to that observed for EpiSC-7, it is very  
204 likely that cells of aCSC-6 are of epicardial origin and are due to incomplete removal during the  
205 cell isolation procedure. Consistent with this, *in situ* hybridization identified *Msln* expression  
206 exclusively within the epicardium (Figure 2B). Similar to so called cycling  
207 fibroblasts/proliferating myofibroblasts (11,12), we found genes involved in cell cycle and mitosis  
208 preferentially in aCSC-7 (*Cenpa*, *Stmn1*, *Ccnb2*) and aCSC-10 (*Top2a*, *Ube2c*, *Hist1h2ap*, *Pclaf*).  
209 Again similar to data in the literature (11,12), we found genes related to the cellular response to  
210 interferon highly expressed in aCSC-8 (*Ifit3*, *Isg15*, *Ifit1*, *Iigp1*, *Ifit3b*), which were termed  
211 interferon-stimulated/interferon-responsive fibroblasts. aCSC-9 highly expressed *Ly6a*, encoding  
212 *Scal*, and resembled the reported *Scal*-high/progenitor-like fibroblasts (11,12). Genes encoding  
213 contractile proteins were preferentially expressed in aCSC-3 (*Acta2*, *Tpm2*), which were recently  
214 referred to as myofibroblasts (12). Expression of Wnt pathway-associated genes was enriched in  
215 aCSC-1 (*Sfrp1*, *Sfrp2*) and aCSC-11 (*Wif1*, *Dkk3*), the latter of which were referred to as Wnt-  
216 expressing/endocardial-derived fibroblasts (11,12). Taken together, all aCSC populations  
217 identified by us are consistent with previously identified cardiac fibroblast populations.

218 To directly compare the transcriptional profile of EpiSC to myocardial aCSC, we performed  
219 canonical correlation analysis (CCA) space alignment of the two scRNAseq data sets (average  
220 RNA expression levels and differentially expressed marker genes are listed in Supplementary  
221 files 5 and 6, respectively). Generated CCA clusters (Figure 3A, left panel) are also displayed  
222 according to original cell IDs (Figure 3A, right panels). The contribution of EpiSC and aCSC  
223 fractions to CCA clusters is summarized in Figure 3B. As can be seen, CCA clusters B and C were  
224 mainly composed of EpiSC indicating that the transcriptional profile of EpiSC-1, 2, 4 is prevalent  
225 in the epicardium (Figure 3B). On the other hand, CCA clusters D-I were dominated by aCSC.  
226 Individual assignments showed that *Wtl*-negative EpiSC-3, 5, 6, 9, 10 carried to a variable degree  
227 expression signatures of genuine aCSC-1, 2, 3, 4, 5, 10, 11. Despite these similarities, there were  
228 multiple significant differences in average gene expression levels when comparing *Wtl*-negative  
229 EpiSC and aCSC within individual CCA clusters (Supplementary file 7). *Wtl*-expressing CCA  
230 clusters A and B were excluded from this comparative analysis, since they contained aCSC6,

231 which probably represents epicardial contamination in the aCSC fraction (see above). As shown  
232 in Figure 3C, expression of epithelial/epicardial genes was generally higher in EpiSC, while  
233 mesenchymal/fibroblast genes were more dominant in aCSC. A distinct fraction of cardiogenic  
234 factors set I (see Figure 2C) was preferentially expressed in EpiSC (Figure 3D) while the opposite  
235 was true for cardiogenic factors set II (Figure 3E). Notably, cardiac contractile proteins (Figure  
236 3F) and HIF-1-responsive glycolytic enzymes (Figure 3G) were predominantly expressed within  
237 EpiSC. Among the paracrine factors (Figure 3H) we found multiple chemokines highly enriched  
238 in EpiSC.

239  
240 To further compare cell states in the two stromal cell fractions, we used SCENIC (18) for gene  
241 regulatory network reconstruction. This tool scores the activity of transcription factors by  
242 correlating their expression with the expression of their direct-binding target genes (18). As shown  
243 in Figure 3 I and J, EpiSC and aCSC showed distinct patterns of network activity, again  
244 emphasizing their different cellular identity and function.

245  
246 Clustering analysis of CSC from uninjured hearts revealed 12 transcriptionally different  
247 populations (Figure 3—figure supplement 3A-C) after cell doublets (Figure 3—figure supplement  
248 4A) and minor non-stromal cell populations (Figure 3—figure supplement 4B) were excluded.  
249 Interestingly, the smallest CSC population (CSC-12) highly expressed epithelial/epicardial genes  
250 (*Msln*, *Upk3b*, *Nkain4*, *Krt19*) (Figure 3—figure supplement 3D) and therefore is likely to  
251 represent cells of the epicardial monolayer. Individual single-cell analysis of this monolayer is  
252 technically not feasible, because the number of cells liberated by shear force from uninjured hearts  
253 is only rather small (estimated ~ 5,600 cells/heart) and there is shear-independent release of cells  
254 (background) of unknown origin (13). As shown in Figure 3—figure supplement 5A-B, CCA  
255 space alignment of the CSC and EpiSC data set revealed that cells with the profile of EpiSC-1, 7  
256 (CCA cluster a) and EpiSC-2, 4, 8 (CCA cluster c) were clearly prevalent in EpiSC, while the  
257 majority of CSC correlated with EpiSC-3, 5 and 6 (CCA cluster f, g, h). Direct comparison of  
258 EpiSC and CSC within individual CCA clusters again showed that expression of  
259 epithelial/epicardial genes was enriched in EpiSC, while transcript levels of the conventional  
260 fibroblast marker *Gsn* were higher in CSC (Figure 3—figure supplement 5C). As to be expected,  
261 gene regulatory network analysis by SCENIC revealed major differences of CSC to EpiSC and  
262 aCSC (Figure 3 I to K).

### 263 **Hierarchy of EpiSC populations**

264 To better define the cellular relationship between the identified EpiSC populations, we combined  
265 scRNAseq of EpiSC with lineage tracing using tamoxifen-inducible *Wt1*-targeted reporter  
266 (*Wt1*<sup>CreERT2</sup>*Rosa*<sup>tdTomato</sup>) mice (Figure 4A). Transcriptional profiles of 13,373 cells from 2 mouse  
267 hearts 5 days after MI were assigned to previously defined EpiSC populations (Figure 4B).  
268 Surprisingly, expression of *tdTomato* fully overlapped with that of *Wt1* (Figure 4C), suggesting



269 that  $WT1^+$  cells within the given time did not convert in cells of any *Wtl*-negative EpiSC  
270 population.

271 RNA velocity analysis (19), which can predict and visualize future cell states based on the ratio of  
272 unspliced and spliced mRNA read counts, supports the notion that EpiSC consists of different  
273 independent groups of cell populations. As shown in Figure 4D, EpiSC-7 and 1 (group I) appeared  
274 to be separated from EpiSC-2, 4, 8 (group II) and EpiSC-6, 5, 3, 9 (group III).

275

276 To study cell-cell communication mediated by ligand-receptor interactions between the EpiSC  
277 populations, we used CellPhoneDB (20). As shown in Figure 4E, the highest numbers of  
278 interactions were predicted between groups I and II. Ligand-receptor pairs potentially involved in  
279 the interaction between the groups include WNT4, TGF- $\beta$ 2 and IGF1 signaling (Supplementary  
280 file 8). Group III not only showed the lowest cell-cell connections, it also showed the lowest  
281 number of expressed genes (Figure 4F). Since the expressed genes per cell correlate with  
282 developmental potential (38), this may indicate that a large fraction of group III cells are terminally  
283 differentiated.

284

285 Mapping of genes characteristic for active cell cycle progression (39) in feature plots of EpiSC  
286 showed that each of the three EpiSC groups identified above was equipped with a cell cluster  
287 expressing a number of cell cycle genes (Figure 4G). Within group I it is subcluster EpiSC-1.4,  
288 within group II a subpopulation of EpiSC-2 and within group III EpiSC-9. This location is very  
289 similar to the origin of velocity arrows (Figure 4D).

## 290 Discussion

291 In this study we provide a single-cell landscape of the post-MI epicardium with 11 transcriptionally  
292 different cell populations. This amazing degree of cellular heterogeneity is similar to that of  
293 myocardial cardiac fibroblasts (11,12). The widely used epicardial lineage marker gene *Wtl* (4)  
294 was selectively expressed in three populations (EpiSC-1, 7, 8), which were localized on the outer  
295 surface of the activated epicardium (Figure 2B). Other commonly used lineage markers and  
296 recently identified epicardial population markers of the developing zebrafish heart (3) were rather  
297 heterogeneously distributed (Figure 2A, Figure 2—figure supplement 2A-B), suggesting that they  
298 mark different stages of differentiation, commitment or activity in the adult heart.

299  
300 The quality of scRNAseq critically depends on the cell isolation technique which ideally should  
301 preserve the native state of cells as close as possible. To minimally perturb the native expression  
302 profile of cardiac stromal cells we have recently elaborated a perfusion protocol for simultaneous  
303 isolation of EpiSC and aCSC from the same infarcted heart, which is short (8 min) and results in  
304 a high yield of viable cells (13). The application of mild shear forces on the cardiac surface by a  
305 simple motor-driven device permitted the rather selective removal of the EpiSC fraction (13). As  
306 compared to a commonly used mincing protocol (30-40 min), we found the yield of aCSC to be  
307 considerably higher with our technique and this was associated with significant lower induction of  
308 immediate early response genes (13). Because of these reasons our data are difficult to compare  
309 with published studies at single-cell resolution of the post-MI heart which relied on a mincing  
310 protocol. These studies have identified either no (40–42) or only one (11,12,43,44) epicardial cell  
311 population.

312  
313 That there are different and genuine cellular identities of EpiSC and aCSC is supported by CCA  
314 space alignment analysis and gene regulatory network analysis, which revealed distinct expression  
315 of epicardial *vs.* mesenchymal/fibroblast genes (Figure 3C) as well as various paracrine factors  
316 (Figure 3H) and individual patterns in transcription factor activity (Figure 3 I and J), respectively.  
317 Direct comparison of cellular expression signatures between EpiSC and aCSC also revealed many  
318 transcriptional similarities which is not surprising in view of their close developmental relationship  
319 (45).

320  
321 Cellular distribution of cell cycle genes (Figure 4G) and RNA velocity analysis (Figure 4D)  
322 suggest that the EpiSC populations can be classified into three different population groups, each  
323 containing a cluster of proliferating cells. Marker genes of group I, comprising *Wtl*- expressing  
324 EpiSC-1 and 7, have been reported in healthy adult mouse epicardium obtained by laser capture  
325 (23) and have been exclusively used in previous single-cell studies to identify epicardial cells (27,  
326 28) (Figure 1F). Surprisingly, group I cells accounted for only 26% of the EpiSC fraction from the  
327 injured heart. Furthermore, the expression of several paracrine proangiogenic factors that were

328 previously considered specifically derived from WT1<sup>+</sup> epicardial cells (8) was not limited to group  
329 I EpiSC, but was even higher in other EpiSC populations (Figure 2E). Thus, about 2/3 of all  
330 epicardial cells were *Wtl*-negative, but they are likely to be also involved in the secretion of  
331 paracrine factors. Furthermore, aCSC expressed numerous paracrine factors (Figure 3H).  
332 Therefore, secretion of paracrine factors appears to be general feature of both epicardial and  
333 myocardial stromal cells which all can contribute to cardioprotection.

334 Group II, consisting of four cell populations, represented 40% of the EpiSC fraction and showed  
335 enriched expression of chemokines known to be involved in attraction of monocytes and  
336 neutrophils (Figure 2D). The expression of these chemokines was a general feature of EpiSC in  
337 comparison to aCSC (Figure 3H). This finding points to a role of epicardial cells in the modulation  
338 of the innate immune response post MI, as was already suggested with regard to adaptive immune  
339 regulation during the post-MI recovery phase (9).

340  
341 Cells with the transcriptional profiles of group I and II populations were generally prevalent in  
342 EpiSC in comparison to aCSC (Figure 3B). Group I and II populations also showed the highest  
343 number of potential ligand-receptor interactions (Figure 4E). Interestingly, EpiSC-8, characterized  
344 by expression of *Wtl* and high transcript levels of HOX transcription factors as well as of genes  
345 annotated with the GO term “Embryonic organ morphogenesis”, also specifically expressed  
346 thymosin  $\beta$ 4 (Figure 2C) which has tissue-regenerating properties (10). The pronounced  
347 expression of cardiogenic factors and contractile proteins in group I (Figure 2C), and the parallel  
348 expression of WT1 and thymosin  $\beta$ 4 suggests that this cellular network has cardiogenic potential  
349 and was involved in the previously reported formation of cardiomyocytes from WT1<sup>+</sup> cells after  
350 thymosin  $\beta$ 4 stimulation (10). Interestingly, group I and II also shared high expression of HIF-1-  
351 responsive glycolytic enzymes (Figure 2F), which again was a general feature of EpiSC compared  
352 to aCSC (Figure 3G). This is in support of the epicardium being a hypoxic niche (46). Since WT1  
353 expression is HIF-1-dependent (37), this is consistent with the view that epicardial HIF-1 signaling  
354 is likely to be an important trigger in the ischemic heart to promote cardioprotection.

355  
356 Group III comprised five cell populations accounting for 34% of all EpiSC. In contrast to group I,  
357 group III EpiSC were found localized throughout the activated epicardium (Figure 2B) and group  
358 III population identifiers also labeled stromal cells within the myocardium (Figure 2B). This  
359 finding is consistent with the transcriptional profile of group III EpiSC that was quite similar to  
360 that of major aCSC populations (Figure 3A and B) and the CSC fraction (Figure 3—figure  
361 supplement 5 A-B). This demonstrated that group III cells exhibit a fibroblast-like phenotype. In  
362 addition, group III EpiSC showed the lowest numbers of both predicted cell-cell interactions  
363 (Figure 4E) and expressed a lower number of genes (Figure 4F), suggesting a less active cell state.  
364 Another remarkable feature of group III was the expression of a second set of cardiogenic factors  
365 (Figure 2C). However, these cardiogenic factors were prevalently expressed in aCSC (Figure 3E)  
366 which is consistent with the postulated cardiogenic potential of cardiac fibroblasts (47). As to the

367 cellular origin of EpiSC, our lineage tracing data suggest, that at day 5 post MI WT1<sup>+</sup> cells are not  
368 the major contributor to epicardial expansion. The *Wtl*-negative fibroblast-like cells in group III  
369 may have either been derived from group II cells or they are myocardial stromal cells that have  
370 migrated into the epicardial multi-cell layer.

371  
372 Histological observations by Zhou *et al.* (8) and Quijada *et al.* (4) found no evidence for migration  
373 of WT1<sup>+</sup> cells into the infarcted myocardium even after longer periods of time. That WT1<sup>+</sup> cells  
374 most likely do not migrate into the infarcted heart appears to be in contrast with a study using  
375 lentiviral labeling of epicardial cells after pericardial injection of virus expressing fluorescent  
376 protein (48). Along the same line we have previously shown, that tracking of epicardial cells after  
377 labeling with fluorescently marked nanoparticles revealed migration into the injured heart (49).  
378 Since group II and III EpiSC constitute the majority of post-MI epicardial cells, it is well  
379 conceivable that populations of *Wtl*-negative cells were preferentially marked by the above-  
380 mentioned labeling techniques and this may explain the reported migration into the injured  
381 myocardium.

382 In summary, our study explored post-MI epicardial cell heterogeneity in the context of all cardiac  
383 stromal cells at unprecedented cellular resolution. Important epicardial properties in post-MI  
384 wound healing/regeneration can now be attributed to specific cell populations. A deeper  
385 understanding of adult epicardial hierarchy may help to decipher the signaling mechanisms by  
386 which individual epicardial cell populations interact to specifically stimulate cardiac repair  
387 processes originating in the epicardium.

## 388 **Methods**

### 389 **Mice**

390 All animal experiments were performed in accordance with the institutional guidelines on animal  
391 care and approved by the Animal Experimental Committee of the local government “Landesamt  
392 für Natur, Umwelt und Verbraucherschutz Nordrhein-Westfalen” (reference number  
393 81-02.04.2019.A181). The animal procedures conformed to the guidelines from Directive  
394 2010/63/EU of the European Parliament on the protection of animals used for scientific purposes.  
395 For this study, male C57BL/6 (Janvier, Le Genest-Saint-Isle, France) and male tamoxifen-  
396 inducible *Wt1*-targeted (*Wt1*<sup>CreERT2</sup>*Rosa*<sup>tdTomato</sup>) mice were used. Inducible *WT1*<sup>CreERT2</sup>*Rosa*<sup>tdTomato</sup>  
397 were generated by crossing the *Wt1*<sup>tm2(cre/ERT2)Wtp/J</sup> strain (stock no: 010912 Jackson Laboratory,  
398 Bar Harbor, US) with the B6;129S6-Gt(*ROSA*)26Sor<sup>tm14(CAG-tdTomato)Hze/J</sup> strain (stock no. 007908;  
399 Jackson Laboratory, Bar Harbor, US) followed by genotyping. Mice (body weight, 20-25 g; age,  
400 8-12 weeks) used in this study were housed at the central animal facility of the Heinrich-Heine-  
401 Universität Düsseldorf (ZETT, Düsseldorf, Germany), were fed with a standard chow diet and  
402 received tap water *ad libitum*.

### 403 **Animal procedures**

404 Myocardial infarction (MI) followed by reperfusion was performed as previously described (14).  
405 In brief, mice were anaesthetized (isoflurane 1.5%) and the left anterior descending coronary artery  
406 (LAD) was ligated for 50 min followed by reperfusion. LAD occlusion was controlled by ST-  
407 segment elevation in electrocardiography recordings. Sham control animals underwent the surgical  
408 procedure without LAD ligation.

409 *Wt1*<sup>CreERT2</sup>-mediated lineage tracing was performed as described previously (10). In brief,  
410 *Wt1*<sup>CreERT2</sup>*Rosa*<sup>tdTomato</sup> mice received tamoxifen injections (2 mg emulsified in sesame oil; i.p.)  
411 5 and 3 days prior MI to induce CreERT2 activity.

### 412 **Isolation of EpiSC, aCSC and CSC**

413 EpiSC and aCSC at day 5 after MI and control CSC from uninjured hearts at day 5 after sham  
414 surgery were isolated as previously described (13). In brief, mice were sacrificed by cervical  
415 dislocation and hearts were excised for preparation of the aortic trunk in ice-cold PBS. Isolated  
416 hearts were immediately cannulated and perfused with PBS (3 min), followed by perfusion with  
417 collagenase solution (8 min; 1,200 U/ml collagenase CLS II (Biochrom, Berlin, Germany) in PBS  
418 at 37°C.

419 EpiSC were simultaneously isolated from post-MI hearts by bathing the heart in its collagenase-  
420 containing coronary effluent while applying mild shear force to the cardiac surface. The effluent was  
421 collected, centrifuged (300 g, 7 min) and cells were resuspended in PBS / 2% FCS / 1 mM EDTA.  
422 Application of shear force and effluent collection was omitted for uninjured sham control hearts  
423 due to the absence of an activated, expanded epicardial layer.

424 aCSC and CSC were isolated by mechanical dissociation of the digested myocardial tissue,  
425 followed by resuspension in Dulbecco's modified eagle medium (DMEM) / 10% FCS. The cell  
426 suspensions were meshed through a 100  $\mu$ m cell strainer and centrifuged at 55 g to separate  
427 cardiomyocytes from non-cardiomyocytes. The supernatants were again passed through a 40  $\mu$ m  
428 cell strainer, centrifuged (7 min, 300 g) and cell pellets were resuspended in PBS / 2% FCS / 1 mM  
429 EDTA. Cells were immediately stained for surface markers and applied to fluorescence-activated  
430 cell sorting.

#### 431 **Fluorescence-activated cell sorting**

432 Cell fractions (EpiSC, aCSC, CSC) were isolated as described above and stained at 4°C (15 min)  
433 with fluorochrome-conjugated antibodies against surface markers of endothelial cells (CD31 (BD  
434 Biosciences, Franklin Lakes, USA) and myeloid cells (CD45 (BD Biosciences)) in presence of  
435 7AAD (viability marker (BD Biosciences)). Sorting was performed with a MoFlo XDP flow  
436 cytometer (Beckman Coulter, Brea, USA), where dead cells (7AAD<sup>+</sup>) and CD31<sup>+</sup>/CD45<sup>+</sup> cells  
437 were excluded by gating on 7AAD<sup>-</sup>/CD31<sup>-</sup>/CD45<sup>-</sup> cells. Sorting of cells isolated from the  
438 Wt1<sup>CreERT2</sup>Rosa<sup>tdTomato</sup> mouse line followed the same gating strategy with one minor change.  
439 Fixable Viability Dye eFluor 780 (eBioscience, San Diego, USA) was used instead of 7AAD to  
440 avoid fluorescence spill-over.

#### 441 **ScRNAseq**

442 The sorted single-cell suspensions were directly used for the scRNAseq experiments. ScRNAseq  
443 analysis was performed by using the 10x Genomics Chromium System (10x Genomics Inc San  
444 Francisco, CA). Cell viability and cell number analysis were performed via trypan blue staining in  
445 a Neubauer counting chamber. A total of 2,000 to 20,000 cells, depending on cell availability,  
446 were used as input for the single-cell droplet libraries generation on the 10x Chromium Controller  
447 system utilizing the Chromium Single Cell 3' Reagent Kit v2 according to manufacturer's  
448 instructions. tdTomato lineage tracing experiments were conducted utilizing the Chromium Single  
449 Cell 3' Reagent Kit v3 according to manufacturer's instructions. Sequencing was carried out on a  
450 HiSeq 3000 system (Illumina Inc. San Diego, USA) according to manufacturer's instructions with  
451 a mean sequencing depth of ~90,000 reads/cell for EpiSC and ~70,000 reads/cell for aCSC.  
452 Differences in sequencing depth were necessary in order to achieve a similar sequencing saturation  
453 between all samples of ~70%.

#### 454 **Processing of scRNAseq data**

455 Raw sequencing data was processed using the 10x Genomics CellRanger software (v3.0.2)  
456 provided by 10x Genomics. Raw BCL-files were demultiplexed and processed to Fastq-files using  
457 the CellRanger *mkfastq* pipeline. Alignment of reads to the mm10 genome and UMI counting was  
458 performed via the CellRanger *count* pipeline to generate a gene-barcode matrix.

459 The median of detected genes per cell was 3,155 for EpiSC, 3,265 for aCSC and 2,241 for CSC.  
460 The median of UMI counts per cell was 10,689 for EpiSC, 11,110 for aCSC and 5,879 for CSC.  
461 Mapping rates (reads mapped to the genome) were about 89% for EpiSC, 90.9% for aCSC and  
462 86.7% for CSC.  
463 For tdTomato lineage tracing experiments a custom reference, consisting of the mm10 genome  
464 and the full-length sequence of tdTomato, was generated via CellRanger *mkref*.

#### 465 **Filtering and clustering of scRNAseq data**

466 Further analyses were carried out with the Seurat v3.0 R package (15). Initial quality control  
467 consisted of removal of cells with fewer than 200 detected genes as well as removal of genes  
468 expressed in less than 3 cells. Furthermore, cells with a disproportionately high mapping rate to  
469 the mitochondrial genome (mitochondrial read percentages >5.0 for EpiSC and aCSC, >7.5 for  
470 CSC) have been removed, as they represent dead or damaged cells. Normalization has been carried  
471 out utilizing SCTransform. Biological replicates have been integrated into one dataset by  
472 identifying pairwise anchors between datasets and using the anchors to harmonize the datasets.  
473 Dimensional reduction of the data set was achieved by Principal Component analysis (PCA) based  
474 on identified variable genes and subsequent UMAP embedding. The number of meaningful  
475 Principal Components (PC) was selected by ranking them according to the percentage of variance  
476 explained by each PC, plotting them in an “Elbow Plot” and manually determining the number of  
477 PCs that represent the majority of variance in the data set. Cells were clustered using the graph-  
478 based clustering approach implemented in Seurat v3.0. Doublet identification was achieved by  
479 using the tool DoubletFinder (v2.0.2) (16) by the generation of artificial doublets, using the PC  
480 distance to find each cell's proportion of artificial k nearest neighbors (pANN) and ranking them  
481 according to the expected number of doublets. Heat maps were generated using Morpheus  
482 (<https://software.broadinstitute.org/morpheus>).

#### 483 **Gene Ontology enrichment analysis**

484 Enriched Gene Ontology (GO) terms in differentially expressed genes between populations were  
485 identified by using the gene ontology enrichment analysis and visualization (GORilla) tool (17).

#### 486 **Canonical correlation analysis (CCA) space alignment**

487 A direct comparison of the EpiSC and aCSC as well as EpiSC and CSC data sets was performed  
488 by Seurat's CCA alignment procedure (v 2.3.4). Briefly, the top 600 variable genes were identified  
489 for each data set and subjected to a CCA. Herein, canonical correlation vectors were identified and  
490 aligned across data sets with dynamic time warping. After alignment, a single integrated clustering  
491 was performed, allowing for comparative analysis of cell populations across both cell fractions.

492 **Gene regulatory network analysis**

493 Gene regulatory network reconstruction and cell-state identification in EpiSC, aCSC and CSC  
494 datasets was performed using the SCENIC (18).

495 **RNA velocity analysis**

496 The Python software `velocity.py` (Version 0.17) (19) was run on the EpiSC count matrices and  
497 BAM files generated by CellRanger (see above) to predict and visualize future cell states based on  
498 the ratio of unspliced and spliced mRNA read counts. For the visualization, cell clusters, PCA and  
499 UMAP data were imported by the Seurat analysis (see above).

500 **Cell-cell communication analysis**

501 Cell-cell communication mediated by ligand-receptor complexes between EpiSC populations was  
502 analyzed using the tool CellPhoneDB v.2.0 (20) after mapping mouse genes to human orthologs.

503 **RNA *in situ* hybridization**

504 *In situ* detection of selected marker gene expression was performed by RNA *in situ* hybridization  
505 using the RNAScope 2.5 HD Detection Kit Assay - RED (Advanced Cell Diagnostics, Hayward,  
506 CA) (21). Fresh frozen hearts (5 days after MI) were cut in 10  $\mu\text{m}$  sections. Fixation and  
507 pretreatment of the cryosections were performed according to the manufacturer's instructions. The  
508 incubation time for the hybridization of RNAScope 2.5 AMP 5 - RED was increased to 120 min  
509 to enhance the signal. For evaluation of the target probe signal the hybridized heart sections were  
510 examined under a standard bright field microscope (BX61 Olympus, Hamburg, Germany) using a  
511 20x objective. Images were processed for publication using ImageJ/Fiji (22).

512 **Statistics**

513 Markers defining each cluster as well as differential gene expression between different clusters  
514 were calculated using a two-sided Wilcoxon Rank-Sum test which is implemented in Seurat.



515 **Acknowledgements**

516 We thank K. Raba (Institute of Transplantation Diagnostics and Cell Therapeutics, University  
517 Duesseldorf) for technical assistance with cell sorting by flow cytometry and J. Schulze  
518 (Department for Genomics & Immunoregulation, Limes, Bonn) for helpful advice and discussions.  
519 JS, JF, MG, NG were supported by a grant of the German Research Council (DFG, SFB1116,  
520 project identifier: 236177352). CO was supported by the DFG-funded International Research  
521 Training Group 1902 (project identifier: 220652768) and this work was part of his PhD thesis. JH  
522 was supported by the Research Committee of the Medical Faculty of the Heinrich Heine University  
523 Düsseldorf (project identifier: 2018-12).

524 **Author contributions**

525 JH and CO conducted the experiments and wrote the manuscript. TL and KK conducted the single-  
526 cell measurements including sequencing and bioinformatic analysis using the 10x Genomics  
527 platform. RZ did the RNA *in situ* hybridization experiments. JW, AL, GK and CD performed  
528 bioinformatic analyses. ZD performed the animal handling and myocardial infarction. CA assisted  
529 with the experiments. MG, NG, JF and AL helped designing the experiments and discussed and/or  
530 interpreted findings. JS planned and coordinated the experiments, wrote and edited the manuscript.

531 **Competing interests**

532 The authors declare no competing interests.

533 **Data availability**

534 ScRNAseq data have been deposited in the ArrayExpress database at EMBL-EBI  
535 ([www.ebi.ac.uk/arrayexpress](http://www.ebi.ac.uk/arrayexpress)) under accession number E-MTAB-10035.

536 **References**

- 537 1. Tallquist MD, Molkenin JD. Redefining the identity of cardiac fibroblasts. *Nature Reviews*  
538 *Cardiology*. August 2017;14(8):484–91.
- 539 2. Cao J, Poss KD. The epicardium as a hub for heart regeneration. *Nature Reviews Cardiology*.  
540 Oktober 2018;15(10):631–47.
- 541 3. Weinberger M, Simões FC, Patient R, Sauka-Spengler T, Riley PR. Functional Heterogeneity  
542 within the Developing Zebrafish Epicardium. *Developmental Cell*. 9. März 2020;52(5):574-  
543 590.e6.
- 544 4. Quijada P, Trembley MA, Small EM. The Role of the Epicardium During Heart Development  
545 and Repair. *Circ Res*. 31. Januar 2020;126(3):377–94.
- 546 5. Masters M, Riley PR. The epicardium signals the way towards heart regeneration. *Stem Cell*  
547 *Research*. 1. November 2014;13(3, Part B):683–92.
- 548 6. Wijk B van, Gunst QD, Moorman AFM, Hoff MJB van den. Cardiac Regeneration from  
549 Activated Epicardium. *PLOS ONE*. 20. September 2012;7(9):e44692.
- 550 7. Bollini S, Vieira JMN, Howard S, Dubè KN, Balmer GM, Smart N, u. a. Re-Activated Adult  
551 Epicardial Progenitor Cells Are a Heterogeneous Population Molecularly Distinct from Their  
552 Embryonic Counterparts. *Stem Cells and Development*. 4. April 2014;23(15):1719–30.
- 553 8. Zhou B, Honor LB, He H, Ma Q, Oh J-H, Butterfield C, u. a. Adult mouse epicardium  
554 modulates myocardial injury by secreting paracrine factors. *J Clin Invest*. 2. Mai  
555 2011;121(5):1894–904.
- 556 9. Ramjee V, Li D, Manderfield LJ, Liu F, Engleka KA, Aghajanian H, u. a. Epicardial  
557 YAP/TAZ orchestrate an immunosuppressive response following myocardial infarction. *J*  
558 *Clin Invest*. 1. März 2017;127(3):899–911.
- 559 10. Smart N, Bollini S, Dubé KN, Vieira JM, Zhou B, Davidson S, u. a. De novo cardiomyocytes  
560 from within the activated adult heart after injury. *Nature*. Juni 2011;474(7353):640–4.
- 561 11. Farbehi N, Patrick R, Dorison A, Xaymardan M, Janbandhu V, Wystub-Lis K, u. a. Single-  
562 cell expression profiling reveals dynamic flux of cardiac stromal, vascular and immune cells  
563 in health and injury. *Morrissey E, Dietz HC, Herausgeber. eLife*. 26. März 2019;8:e43882.
- 564 12. Forte E, Skelly DA, Chen M, Daigle S, Morelli KA, Hon O, u. a. Dynamic Interstitial Cell  
565 Response during Myocardial Infarction Predicts Resilience to Rupture in Genetically Diverse  
566 Mice. *Cell Reports*. 3. März 2020;30(9):3149-3163.e6.
- 567 13. Owenier C, Hesse J, Alter C, Ding Z, Marzoq A, Petzsch P, u. a. Novel technique for the  
568 simultaneous isolation of cardiac fibroblasts and epicardial stromal cells from the infarcted  
569 murine heart. *Cardiovasc Res*. 1. April 2020;116(5):1047–58.

- 570 14. Bönner F, Borg N, Burghoff S, Schrader J. Resident Cardiac Immune Cells and Expression  
571 of the Ectonucleotidase Enzymes CD39 and CD73 after Ischemic Injury. *PLOS ONE*. 13.  
572 April 2012;7(4):e34730.
- 573 15. Butler A, Hoffman P, Smibert P, Papalexi E, Satija R. Integrating single-cell transcriptomic  
574 data across different conditions, technologies, and species. *Nat Biotechnol*. Mai  
575 2018;36(5):411–20.
- 576 16. McGinnis CS, Murrow LM, Gartner ZJ. DoubletFinder: Doublet Detection in Single-Cell  
577 RNA Sequencing Data Using Artificial Nearest Neighbors. *Cell Systems*. 24. April  
578 2019;8(4):329–337.e4.
- 579 17. Eden E, Navon R, Steinfeld I, Lipson D, Yakhini Z. GOrilla: a tool for discovery and  
580 visualization of enriched GO terms in ranked gene lists. *BMC Bioinformatics*. 3. Februar  
581 2009;10(1):48.
- 582 18. Aibar S, González-Blas CB, Moerman T, Huynh-Thu VA, Imrichova H, Hulselmans G, u. a.  
583 SCENIC: single-cell regulatory network inference and clustering. *Nature Methods*.  
584 November 2017;14(11):1083–6.
- 585 19. La Manno G, Soldatov R, Zeisel A, Braun E, Hochgerner H, Petukhov V, u. a. RNA velocity  
586 of single cells. *Nature*. August 2018;560(7719):494–8.
- 587 20. Efremova M, Vento-Tormo M, Teichmann SA, Vento-Tormo R. CellPhoneDB: inferring  
588 cell–cell communication from combined expression of multi-subunit ligand–receptor  
589 complexes. *Nature Protocols*. April 2020;15(4):1484–506.
- 590 21. Wang F, Flanagan J, Su N, Wang L-C, Bui S, Nielson A, u. a. RNAscope: A Novel in Situ  
591 RNA Analysis Platform for Formalin-Fixed, Paraffin-Embedded Tissues. *The Journal of*  
592 *Molecular Diagnostics*. 1. Januar 2012;14(1):22–9.
- 593 22. Schindelin J, Arganda-Carreras I, Frise E, Kaynig V, Longair M, Pietzsch T, u. a. Fiji: an  
594 open-source platform for biological-image analysis. *Nat Methods*. 28. Juni 2012;9(7):676–  
595 82.
- 596 23. Bochmann L, Sarathchandra P, Mori F, Lara-Pezzi E, Lazzaro D, Rosenthal N. Revealing  
597 New Mouse Epicardial Cell Markers through Transcriptomics. *PLOS ONE*. 28. Juni  
598 2010;5(6):e11429.
- 599 24. Vieira JM, Howard S, Villa del Campo C, Bollini S, Dubé KN, Masters M, u. a. BRG1-  
600 SWI/SNF-dependent regulation of the Wt1 transcriptional landscape mediates epicardial  
601 activity during heart development and disease. *Nature Communications*. 24. Juli  
602 2017;8(1):16034.
- 603 25. Chiapparo G, Lin X, Lescroart F, Chabab S, Paulissen C, Pitisci L, u. a. Mesp1 controls the  
604 speed, polarity, and directionality of cardiovascular progenitor migration. *J Cell Biol*. 23. Mai  
605 2016;213(4):463–77.

- 606 26. Steimle JD, Moskowitz IP. TBX5: A Key Regulator of Heart Development. *Curr Top Dev*  
607 *Biol.* 2017;122:195–221.
- 608 27. Whitcomb J, Gharibeh L, Nemer M. From embryogenesis to adulthood: Critical role for  
609 GATA factors in heart development and function. *IUBMB Life.* 2020;72(1):53–67.
- 610 28. Nolte C, Kumar BD, Krumlauf R. Hox genes: Downstream “effectors” of retinoic acid  
611 signaling in vertebrate embryogenesis. *genesis.* 2019;57(7–8):e23306.
- 612 29. Roux M, Zaffran S. Hox Genes in Cardiovascular Development and Diseases. *Journal of*  
613 *Developmental Biology.* Juni 2016;4(2):14.
- 614 30. Brown CO, Chi X, Garcia-Gras E, Shirai M, Feng X-H, Schwartz RJ. The Cardiac  
615 Determination Factor, Nkx2-5, Is Activated by Mutual Cofactors GATA-4 and Smad1/4 via  
616 a Novel Upstream Enhancer. *J Biol Chem.* 3. Dezember 2004;279(11):10659–69.
- 617 31. Russell JL, Goetsch SC, Gaiano NR, Hill JA, Olson EN, Schneider JW. A dynamic Notch  
618 injury response activates epicardium and contributes to fibrosis-repair. *Circ Res.* 7. Januar  
619 2011;108(1):51–9.
- 620 32. Bujak M, Dobaczewski M, Gonzalez-Quesada C, Xia Y, Leucker T, Zymek P, u. a. Induction  
621 of the CXC chemokine interferon-gamma-inducible protein 10 regulates the reparative  
622 response following myocardial infarction. *Circ Res.* 6. November 2009;105(10):973–83.
- 623 33. Sundararaman S, Miller TJ, Pastore JM, Kiedrowski M, Aras R, Penn MS. Plasmid-based  
624 transient human stromal cell-derived factor-1 gene transfer improves cardiac function in  
625 chronic heart failure. *Gene Therapy.* September 2011;18(9):867–73.
- 626 34. Chen H, Li D, Saldeen T, Mehta JL. TGF- $\beta$ 1 attenuates myocardial ischemia-reperfusion  
627 injury via inhibition of upregulation of MMP-1. *American Journal of Physiology-Heart and*  
628 *Circulatory Physiology.* 1. Mai 2003;284(5):H1612–7.
- 629 35. Dai W, Kloner RA. Cardioprotection of insulin-like growth factor-1 during reperfusion  
630 therapy: what is the underlying mechanism or mechanisms? *Circ Cardiovasc Interv.* August  
631 2011;4(4):311–3.
- 632 36. Korf-Klingebiel M, Reboll MR, Klede S, Brod T, Pich A, Polten F, u. a. Myeloid-derived  
633 growth factor (C19orf10) mediates cardiac repair following myocardial infarction. *Nat Med.*  
634 Februar 2015;21(2):140–9.
- 635 37. Wagner K-D, Wagner N, Wellmann S, Schley G, Bondke A, Theres H, u. a. Oxygen-  
636 regulated expression of the Wilms’ tumor suppressor Wt1 involves hypoxia-inducible factor-  
637 1 (HIF-1). *The FASEB Journal.* 2003;17(10):1364–6.
- 638 38. Gulati GS, Sikandar SS, Wesche DJ, Manjunath A, Bharadwaj A, Berger MJ, u. a. Single-  
639 cell transcriptional diversity is a hallmark of developmental potential. *Science.* 24. Januar  
640 2020;367(6476):405–11.

- 641 39. Meijden CMJ van der, Lapointe DS, Luong MX, Peric-Hupkes D, Cho B, Stein JL, u. a. Gene  
642 Profiling of Cell Cycle Progression through S-Phase Reveals Sequential Expression of Genes  
643 Required for DNA Replication and Nucleosome Assembly. *Cancer Res.* 1. Juni  
644 2002;62(11):3233–43.
- 645 40. Skelly DA, Squiers GT, McLellan MA, Bolisetty MT, Robson P, Rosenthal NA, u. a. Single-  
646 Cell Transcriptional Profiling Reveals Cellular Diversity and Intercommunication in the  
647 Mouse Heart. *Cell Reports.* 16. Januar 2018;22(3):600–10.
- 648 41. Gladka MM, Molenaar B, de Ruiter H, van der Elst S, Tsui H, Versteeg D, u. a. Single-Cell  
649 Sequencing of the Healthy and Diseased Heart Reveals Cytoskeleton-Associated Protein 4  
650 as a New Modulator of Fibroblasts Activation. *Circulation.* 10 2018;138(2):166–80.
- 651 42. Kretzschmar K, Post Y, Bannier-Hélaouët M, Mattiotti A, Drost J, Basak O, u. a. Profiling  
652 proliferative cells and their progeny in damaged murine hearts. *PNAS.* 26. Dezember  
653 2018;115(52):E12245–54.
- 654 43. Cui Y, Zheng Y, Liu X, Yan L, Fan X, Yong J, u. a. Single-Cell Transcriptome Analysis  
655 Maps the Developmental Track of the Human Heart. *Cell Reports.* 12. Februar  
656 2019;26(7):1934-1950.e5.
- 657 44. Asp M, Giacomello S, Larsson L, Wu C, Fürth D, Qian X, u. a. A Spatiotemporal Organ-  
658 Wide Gene Expression and Cell Atlas of the Developing Human Heart. *Cell.* 12. Dezember  
659 2019;179(7):1647-1660.e19.
- 660 45. Doppler SA, Carvalho C, Lahm H, Deutsch M-A, Dreßen M, Puluca N, u. a. Cardiac  
661 fibroblasts: more than mechanical support. *J Thorac Dis.* März 2017;9(Suppl 1):S36–51.
- 662 46. Kimura W, Sadek HA. The cardiac hypoxic niche: emerging role of hypoxic  
663 microenvironment in cardiac progenitors. *Cardiovascular Diagnosis and Therapy.* 18.  
664 Dezember 2012;2(4):278-289–289.
- 665 47. Furtado MB, Costa MW, Pranoto EA, Salimova E, Pinto AR, Lam NT, u. a. Cardiogenic  
666 genes expressed in cardiac fibroblasts contribute to heart development and repair. *Circ Res.*  
667 25. April 2014;114(9):1422–34.
- 668 48. Gittenberger-de Groot AC, Winter EM, Poelmann RE. Epicardium-derived cells (EPDCs) in  
669 development, cardiac disease and repair of ischemia. *J Cell Mol Med.* Mai 2010;14(5):1056–  
670 60.
- 671 49. Ding Z, Temme S, Quast C, Friebe D, Jacoby C, Zanger K, u. a. Epicardium-Derived Cells  
672 Formed After Myocardial Injury Display Phagocytic Activity Permitting In Vivo Labeling  
673 and Tracking. *Stem Cells Transl Med.* Mai 2016;5(5):639–50.

674

675 **Figures**

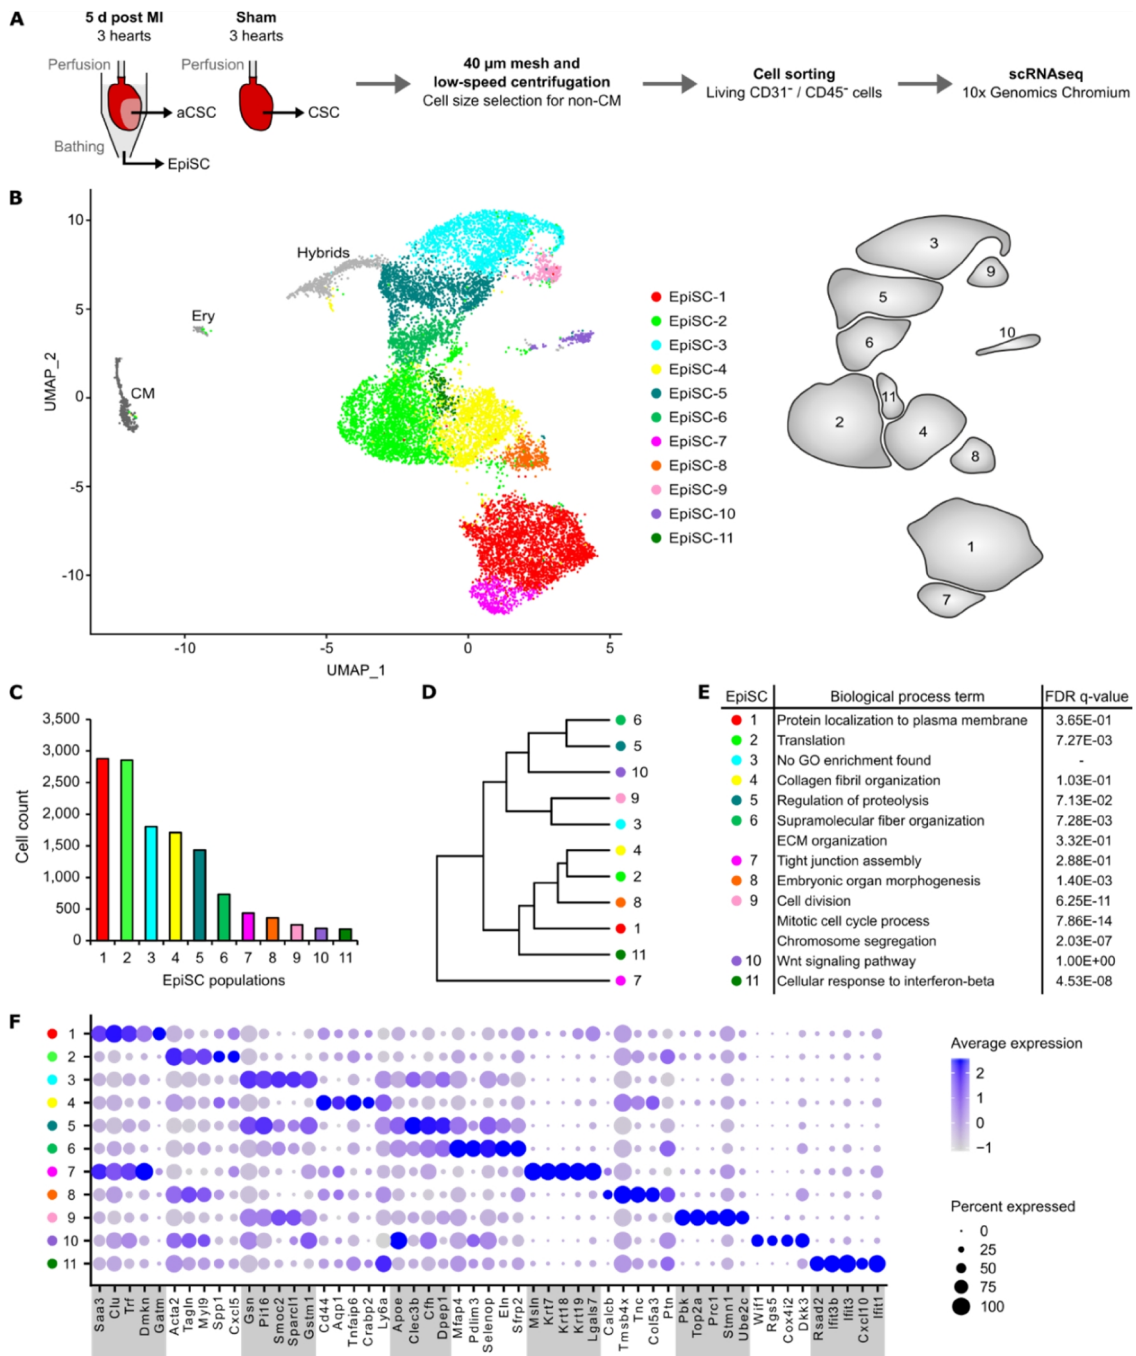

676

677  
678  
679  
680  
681  
682  
683  
684

**Figure 1. Cell populations in EpiSC from the infarcted heart.** (A) Schematic workflow. EpiSC and aCSC were simultaneously collected from the surface and the myocardium of the isolated perfused heart by applying mild shear forces to the cardiac surface (13) at 5 day post MI (n=3). CSC were purified from 3 non-infarcted control hearts 5 days after sham surgery. Mesh purification, low-speed centrifugation and cell sorting by flow cytometry was performed to remove cardiomyocytes, CD31<sup>+</sup> endothelial cells, CD45<sup>+</sup> immune cells and apoptotic or necrotic cells before analysis using the 10x Genomics Chromium platform. (B) UMAP plot of clustered scRNAseq data of the pooled EpiSC fraction (n=13,796 single cells). Identified EpiSC populations are color-coded as well as shown in the scheme on the right. CM, cardiomyocytes; Ery, erythrocytes. (C) Cell count of EpiSC populations. (D) Dendrogram of EpiSC populations according to average RNA expression. (E) Significant GO biological process terms. (F) Dot plot of top 5 marker genes for each EpiSC population.

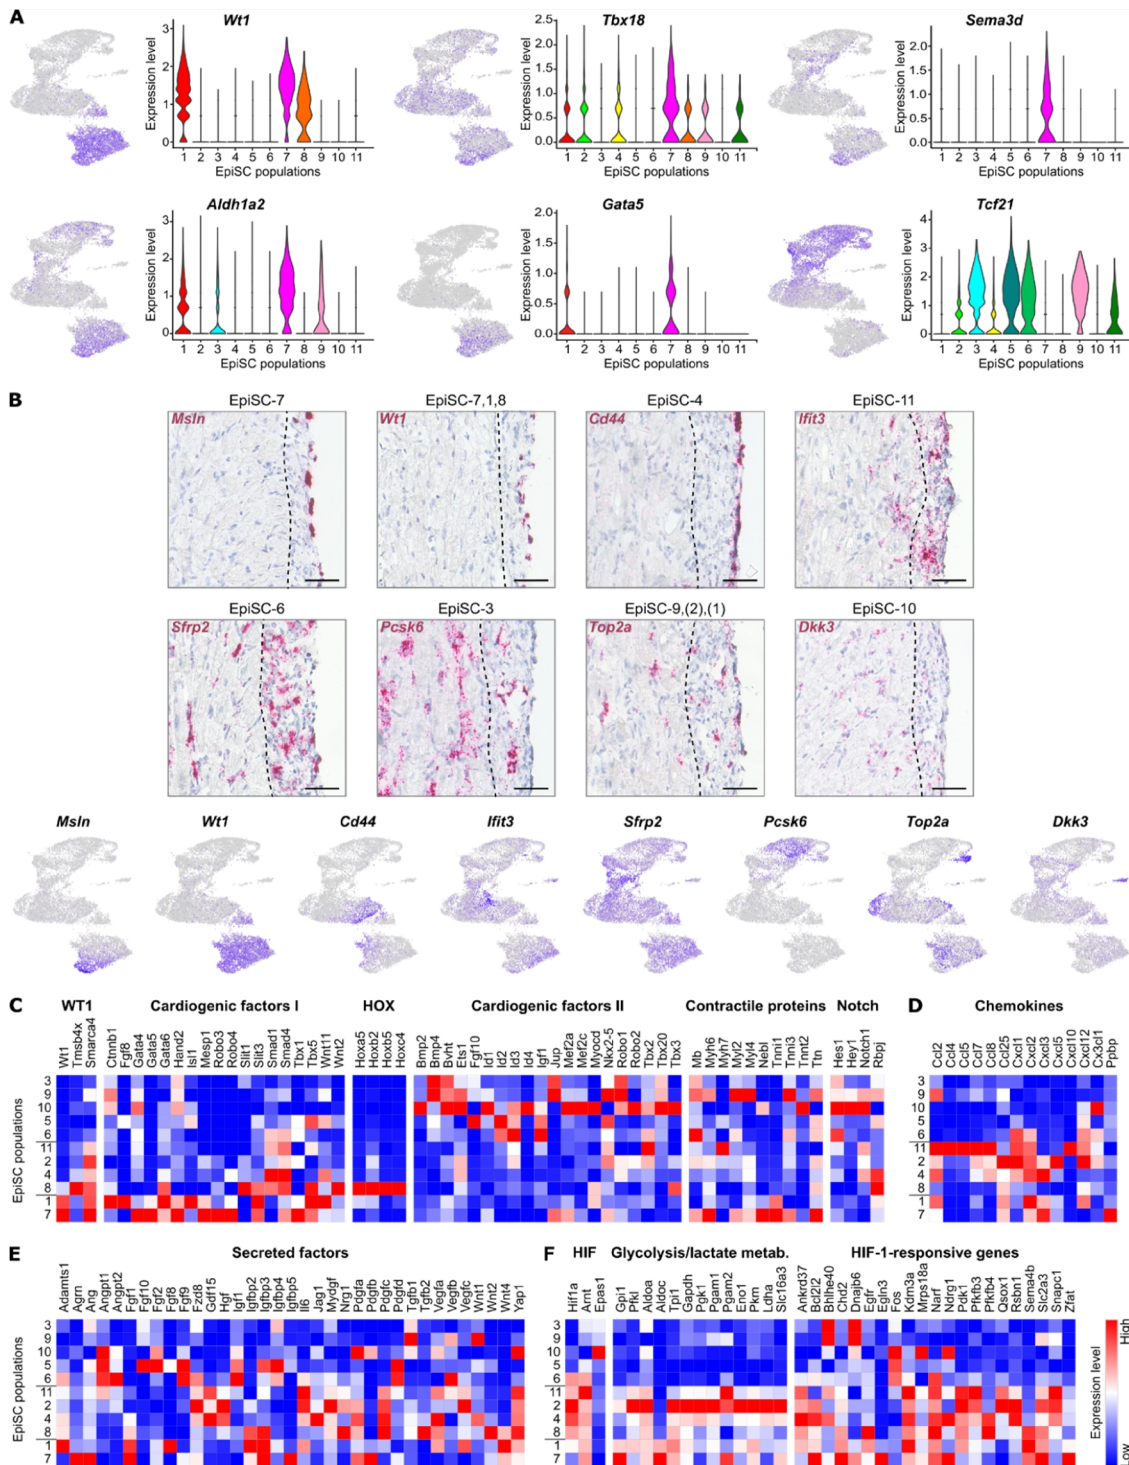

685

686  
687  
688  
689  
690  
691  
692

**Figure 2. Molecular characterization and location of EpiSC populations.** (A) Expression of epicardial progenitor cell markers visualized in feature and violin plots. (B) Upper panel: RNA *in situ* hybridization of EpiSC population identifiers (red) in heart cryosections 5 days post MI. Representative images ( $n=4$  hearts) of the infarct border zone are shown. The dotted line marks the interface between myocardial / epicardial tissue according to cell morphology. Nuclei were stained with hematoxylin (blue). Scale bars, 50  $\mu$ m. Lower panel: Feature plots visualizing EpiSC population molecular identifiers. (C to F) Heat maps showing the expression of cardiogenic factors and Notch target genes (C), chemokines (D), further secreted factors (E) as well as genes associated with HIF-1 signaling (F). EpiSC populations are listed according to their position on the UMAP plot.

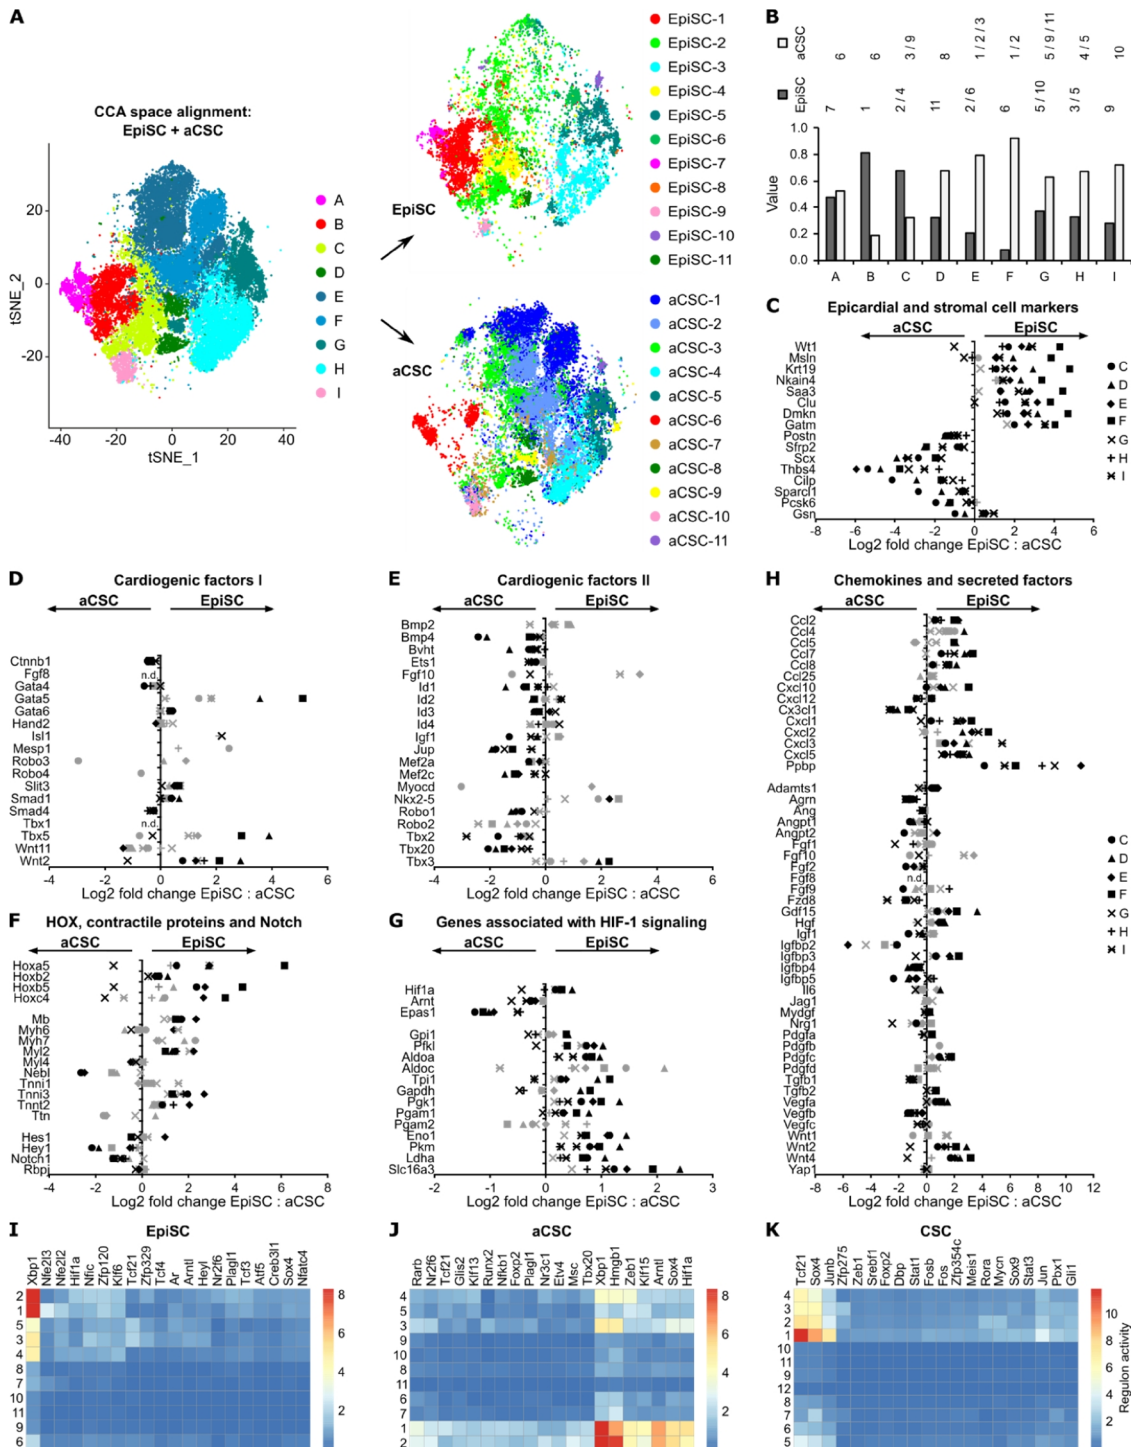

693

694

695

696

697

698

699

700

**Figure 3. Comparison of EpiSC to aCSC.** (A) Canonical correlation analysis (CCA) space alignment of EpiSC and aCSC scRNAseq data in one *t*-SNE plot (left) and split in one plot each (right). Cells are color-coded according to their assignment to CCA clusters (left) or previously identified populations (right). (B) Contribution of EpiSC and aCSC fractions to CCA clusters. (C to H) Relative expression of epicardial and stromal cell markers (C), cardiogenic factors (D and E), HOX transcription factors, contractile proteins and Notch target genes (F), genes associated with HIF-1 signaling (G) as well as chemokines and other secreted factors (H) in aCSC and EpiSC fractions as log<sub>2</sub> fold change. Black symbols p-value ≤ 0.001; grey symbols p-value > 0.001. n.d., not defined. (I to K) Gene regulatory network analysis in EpiSC (I), aCSC (J) and CSC (K) populations by SCENIC.



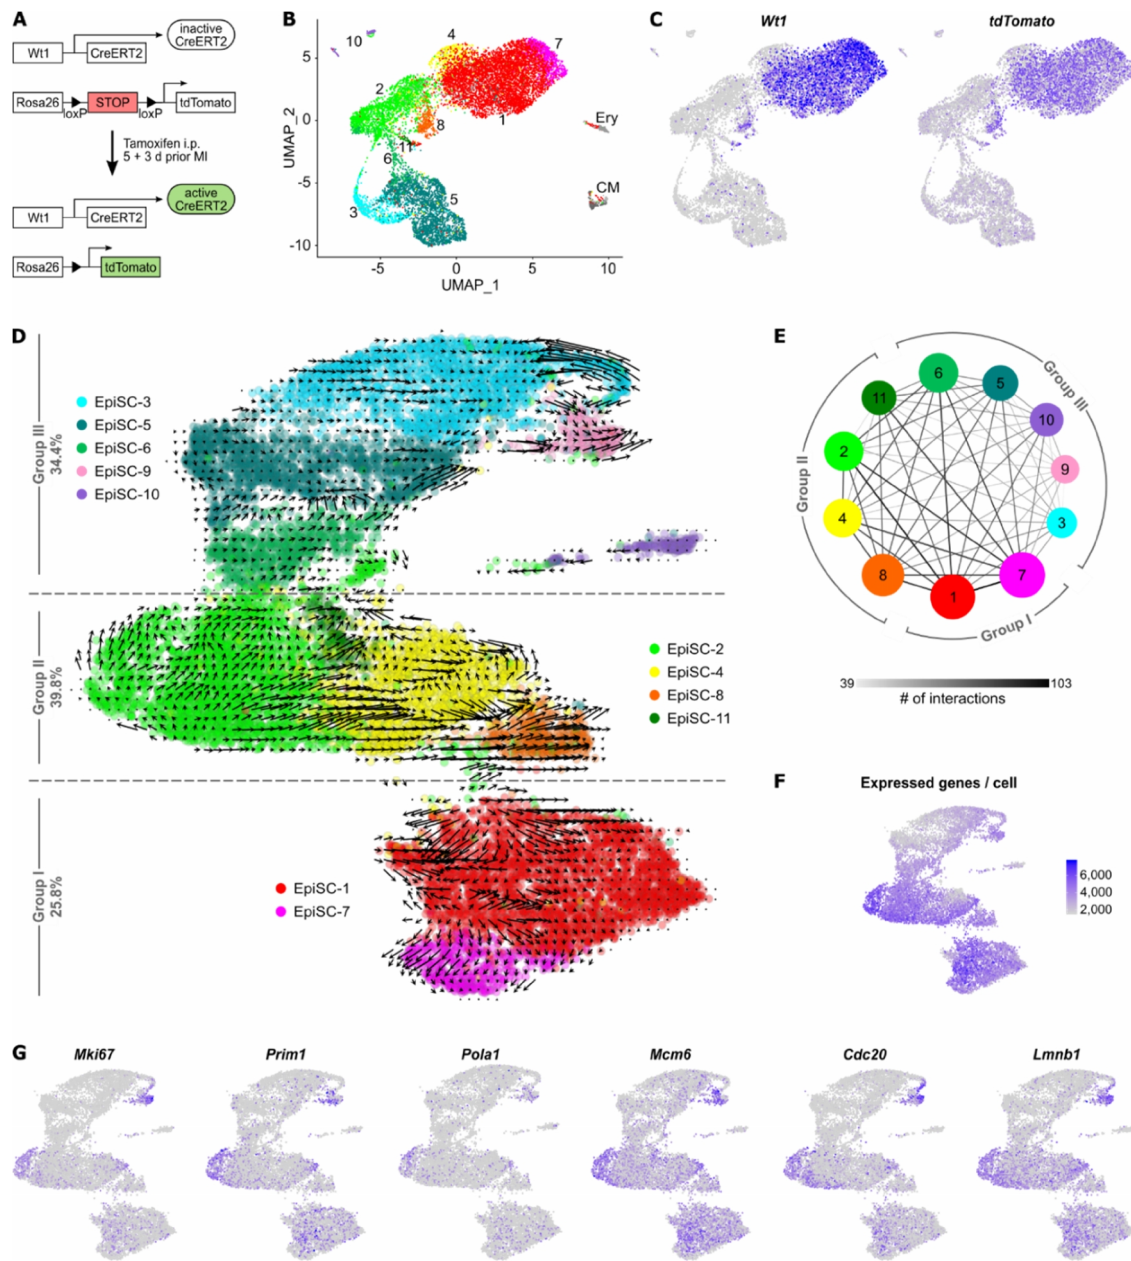

701  
702  
703  
704  
705  
706  
707

**Figure 4. Cell hierarchy of EpiSC populations.** (A to C) Lineage tracing of *Wt1*-expressing cell populations post MI using *Wt1*<sup>CreERT2</sup>*Rosa*<sup>tdTomato</sup> mice. The experimental design is outlined in (A). UMAP plot of clustered scRNAseq data of the EpiSC fraction ( $n=13,373$  single cells) pooled from two hearts 5 days post MI is shown in (B). Expression of *Wt1* and *tdTomato* is visualized in (C). (D) RNA velocity of EpiSC populations projected on the UMAP plot. Arrows show the local average velocity evaluated on a regular grid, indicating estimated future states. (E) Networks visualizing number of potential specific interactions between EpiSC populations as determined by CellPhoneDB. (F) Feature plot displaying the number of unique genes detected in each cell. (G) Expression of genes associated with cell proliferation visualized in feature plots.

## 708 **Figure supplements titles/legends**

709 **Figure 1—figure supplement 1. Excluded hybrid and non-stromal cell populations in the EpiSC fraction.** (A)  
710 DoubletFinder tool was used to detect cell doublets with hybrid transcriptomes. **B** Heat map showing the expression  
711 of markers for cardiomyocytes (CM) and erythrocytes (Ery) used to identify residual populations of non-stromal  
712 cells.

713 **Figure 2—figure supplement 1. Subclusters of *Wtl*-expressing EpiSC populations.** (A) UMAP plot of subclusters  
714 (Sub) of *Wtl*-expressing EpiSC-7, -1 and 8. (B) UMAP plot of the subclustering with labelling according to previous  
715 identity. (C) Transfer of subcluster labelling to UMAP plot of all EpiSC populations showing the position of identified  
716 subclusters. (D) Dot plot of top 5 marker genes for each subcluster together with EpiSC-7 and EpiSC-8.

717 **Figure 2—figure supplement 2. Expression of epicardial markers previously identified in the developing**  
718 **zebrafish heart in mouse post-MI EpiSC.** Expression of epicardial population markers identified in the developing  
719 zebrafish heart by Weinberger *et al.* (3) visualized in the whole EpiSC fraction (A and B) and in *Wtl*-expressing  
720 subclusters (C and D) via feature plots and heat maps. For each of the three zebrafish epicardial populations (Epi1,  
721 Epi2, Epi3) selected marker genes are shown.

722 **Figure 3—figure supplement 1. Cell populations in aCSC from infarcted myocardium.** (A) UMAP plot of  
723 clustered scRNAseq data of the pooled aCSC fraction ( $n=24,470$  single cells). Each point represents a single cell  
724 and identified cell populations are color-coded. CM, cardiomyocytes; Ery, erythrocytes; EC, endothelial cells. (B)  
725 Scheme of the populations from (A) and population cell counts of aCSC. (C) Dendrogram of aCSC populations  
726 according to average RNA expression. (D) Dot plot of top 5 marker genes for each aCSC population.

727 **Figure 3—figure supplement 2. Excluded hybrid and non-stromal cell populations in the aCSC fraction.** (A)  
728 DoubletFinder tool was used to detect cell doublets with hybrid transcriptomes. **B** Heat map showing the expression  
729 of markers for mural cells, endothelial cells (EC), immune cells, cardiomyocytes (CM), and erythrocytes (Ery) used  
730 to identify residual populations of non-stromal cells.

731 **Figure 3—figure supplement 3. Cell populations in CSC from control hearts.** (A) UMAP plot of clustered  
732 scRNAseq data of the pooled CSC fraction ( $n=24,781$  single cells). Each point represents a single cell and identified  
733 cell populations are color-coded. CM, cardiomyocytes; EC, endothelial cells. (B) Scheme of the populations from  
734 (A) and population cell counts of and CSC. (C) Dendrogram of and CSC populations according to average RNA  
735 expression. (D) Dot plot of top 5 marker genes for each CSC population.

736 **Figure 3—figure supplement 4. Excluded hybrid and non-stromal cell populations in the CSC fraction.** (A)  
737 DoubletFinder tool was used to detect cell doublets with hybrid transcriptomes. (B) Heat map showing the  
738 expression of markers for mural cells, cardiomyocytes (CM), endothelial cells (EC), glial cells, and immune cells  
739 used to identify residual populations of non-stromal cells (grey filling, gene expression not detected).

740 **Figure 3—figure supplement 5. Comparison of EpiSC to CSC.** (A) CCA space alignment of EpiSC and CSC  
741 scRNAseq data in one *t*-SNE plot (left) and split in one plot each (right). Cells are color-coded according to their  
742 assignment to CCA clusters (left) or previously identified populations (right). (B) Contribution of EpiSC and CSC  
743 fractions to CCA clusters. (C) Relative expression of epicardial and stromal cell markers in CSC and EpiSC  
744 fractions from non-epithelial CCA clusters C-I as log<sub>2</sub> fold change. Black symbols p-value  $\leq 0.001$ ; grey symbols  
745 p-value  $> 0.001$ .

746 **Source data titles**

747 **Figure 1—source data 1**

748 **Source data for EpiSC population cell counts summarized in Figure 1C.**

749 **Figure 3—source data 1**

750 **Source data for aCSC population cell counts summarized in Figure 3—Figure Supplement 1B.**

751 **Figure 3—source data 2**

752 **Source data for aCSC population cell counts summarized in Figure 3—Figure Supplement 3B.**

753 **Supplementary files titles**

754 **Supplementary file 1**

755 **Average gene expression levels in EpiSC, aCSC and CSC populations.**

756 **Supplementary file 2**

757 **Genes with significantly enriched expression among EpiSC, aCSC and CSC populations.**

758 **Supplementary file 3**

759 **Average gene expression levels in subclusters of *Wt1*-expressing EpiSC populations.**

760 **Supplementary file 4**

761 **Genes with significantly enriched expression among subclusters of *Wt1*-expressing EpiSC populations.**

762 **Supplementary file 5**

763 **Average gene expression levels in clusters from CCA space alignment of EpiSC and aCSC with separation in**  
764 **EpiSC and aCSC.**

765 **Supplementary file 6**

766 **Genes with significantly enriched expression among clusters from CCA space alignment of EpiSC and aCSC.**

767 **Supplementary file 7**

768 **Relative gene expression in EpiSC and aCSC within individual CCA clusters as log<sub>2</sub> fold change with p-values.**

769 **Supplementary file 8**

770 **Selected ligand-receptor interactions between EpiSC populations as predicted by CellPhoneDB.**

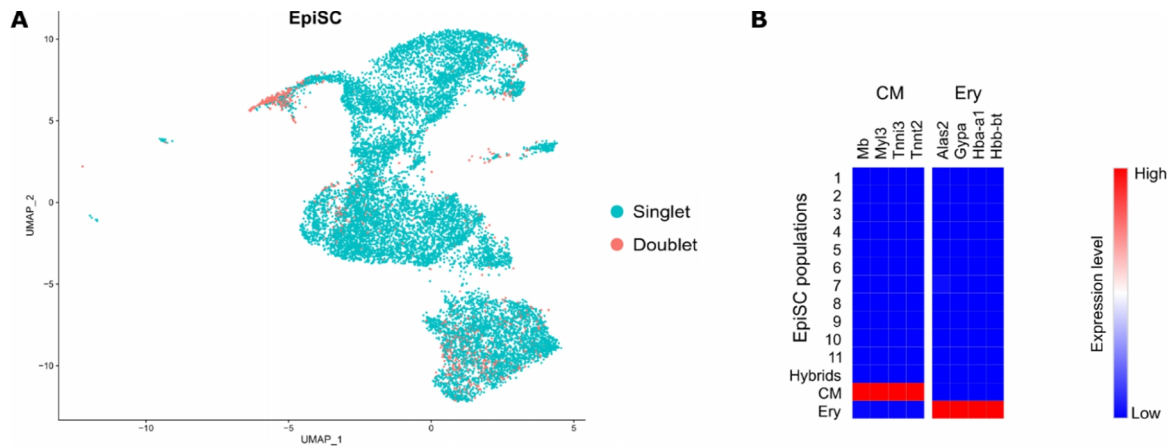

**Figure 1—figure supplement 1. Excluded hybrid and non-stromal cell populations in the EpiSC fraction.** (A) DoubletFinder tool was used to detect cell doublets with hybrid transcriptomes. (B) Heat map showing the expression of markers for cardiomyocytes (CM) and erythrocytes (Ery) used to identify residual populations of non-stromal cells.

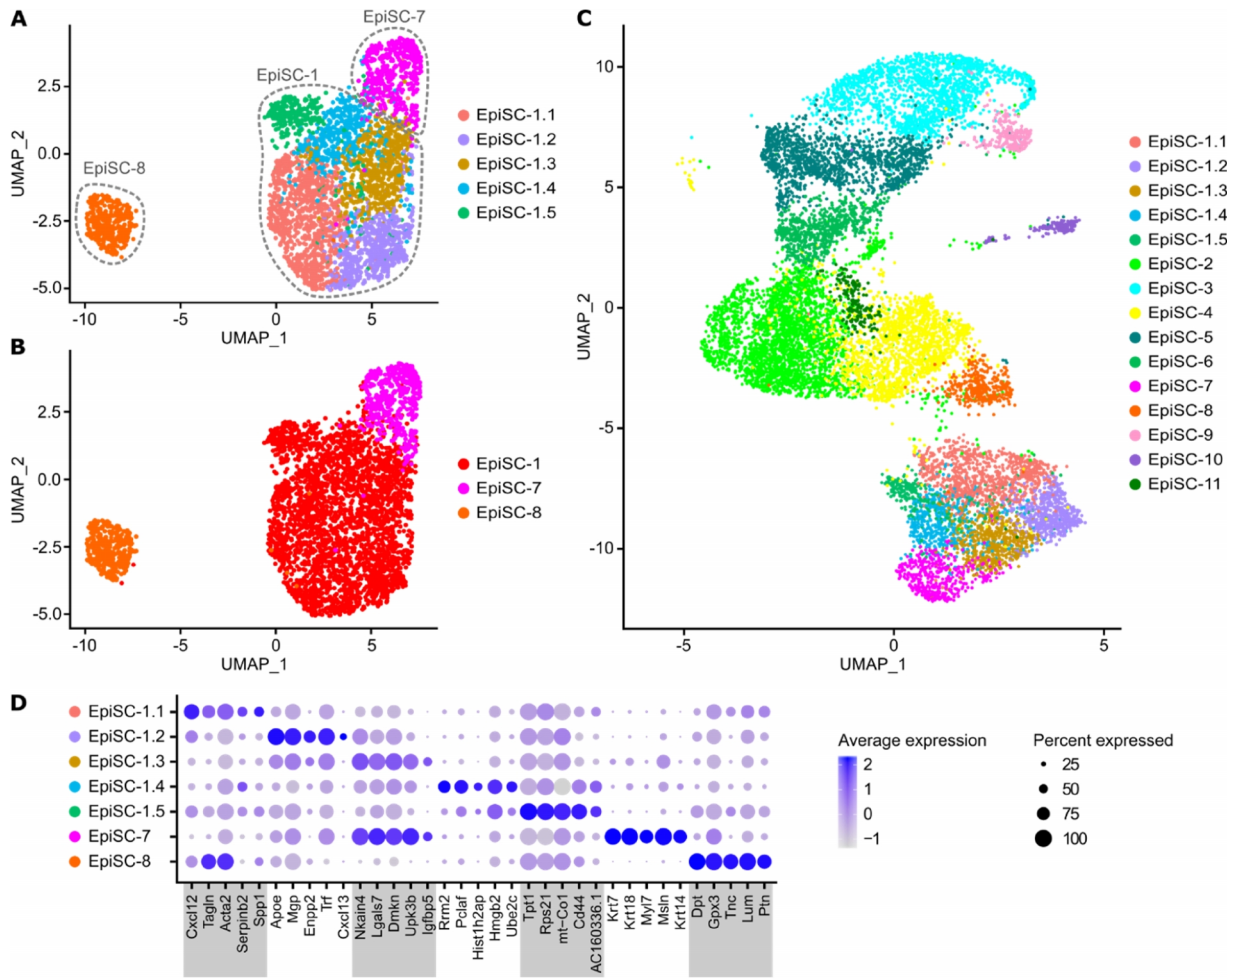

**Figure 2—figure supplement 1. Subclusters of *Wtl*-expressing EpiSC populations.** (A) UMAP plot of subclusters (Sub) of *Wtl*-expressing EpiSC-7, -1 and 8. (B) UMAP plot of the subclustering with labelling according to previous identity. (C) Transfer of subcluster labelling to UMAP plot of all EpiSC populations showing the position of identified subclusters. (D) Dot plot of top 5 marker genes for each subcluster together with EpiSC-7 and EpiSC-8.

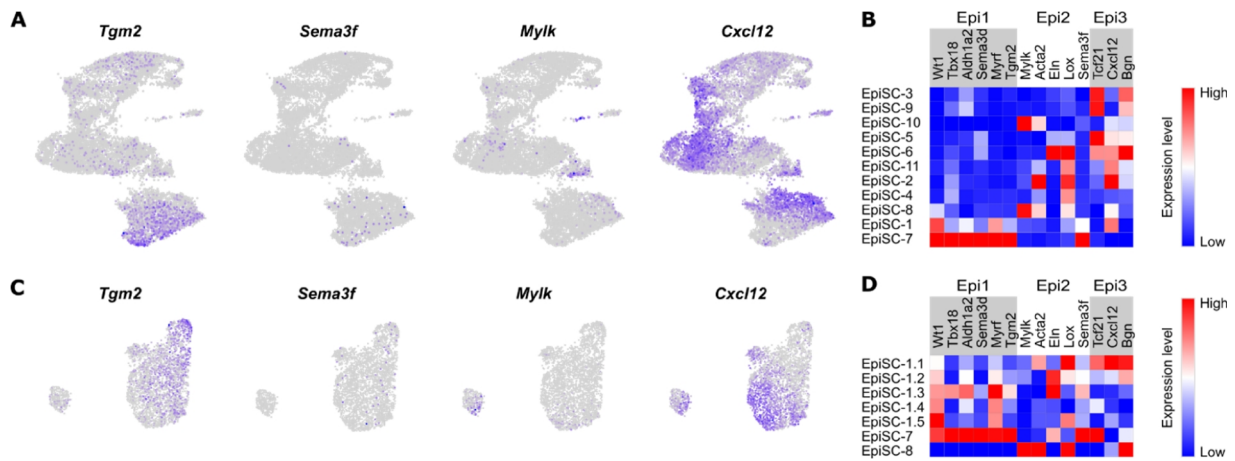

**Figure 2—figure supplement 2. Expression of epicardial markers previously identified in the developing zebrafish heart in mouse post-MI EpiSC.** Expression of epicardial population markers identified in the developing zebrafish heart by Weinberger *et al.* (3) visualized in the whole EpiSC fraction (A and B) and in *Wt1*-expressing subclusters (C and D) via feature plots and heat maps. For each of the three zebrafish epicardial populations (Epi1, Epi2, Epi3) selected marker genes are shown.

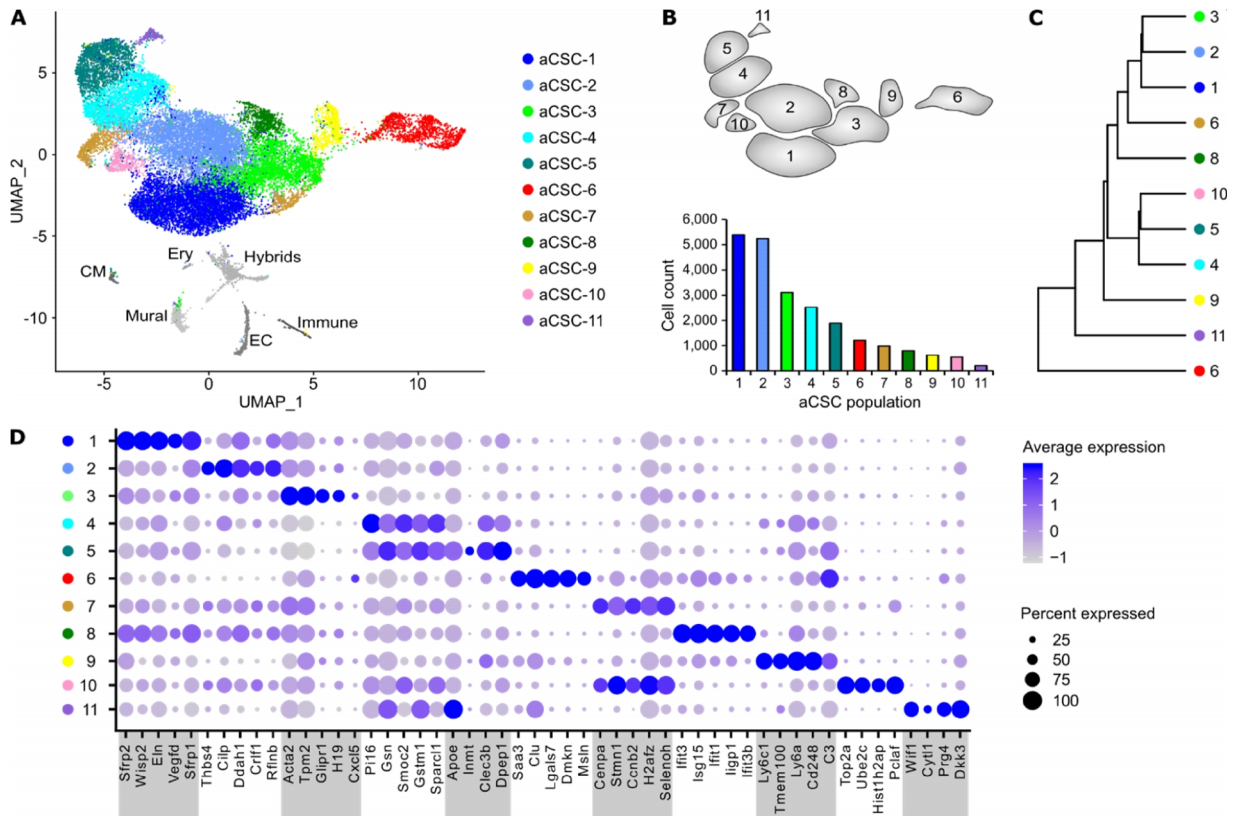

**Figure 3—figure supplement 1. Cell populations in aCSC from infarcted myocardium. (A)** UMAP plot of clustered scRNAseq data of the pooled aCSC fraction ( $n=24,470$  single cells). Each point represents a single cell and identified cell populations are color-coded. CM, cardiomyocytes; Ery, erythrocytes; EC, endothelial cells. **(B)** Scheme of the populations from (A) and population cell counts of aCSC. **(C)** Dendrogram of aCSC populations according to average RNA expression. **(D)** Dot plot of top 5 marker genes for each aCSC population.



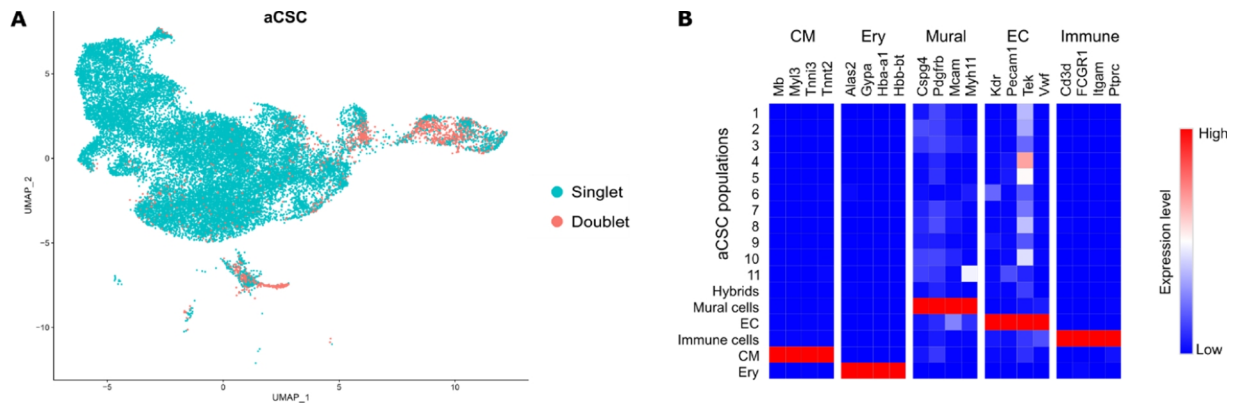

**Figure 3—figure supplement 2. Excluded hybrid and non-stromal cell populations in the aCSC fraction.** (A) DoubletFinder tool was used to detect cell doublets with hybrid transcriptomes. (B) Heat map showing the expression of markers for mural cells, endothelial cells (EC), immune cells, cardiomyocytes (CM), and erythrocytes (Ery) used to identify residual populations of non-stromal cells.

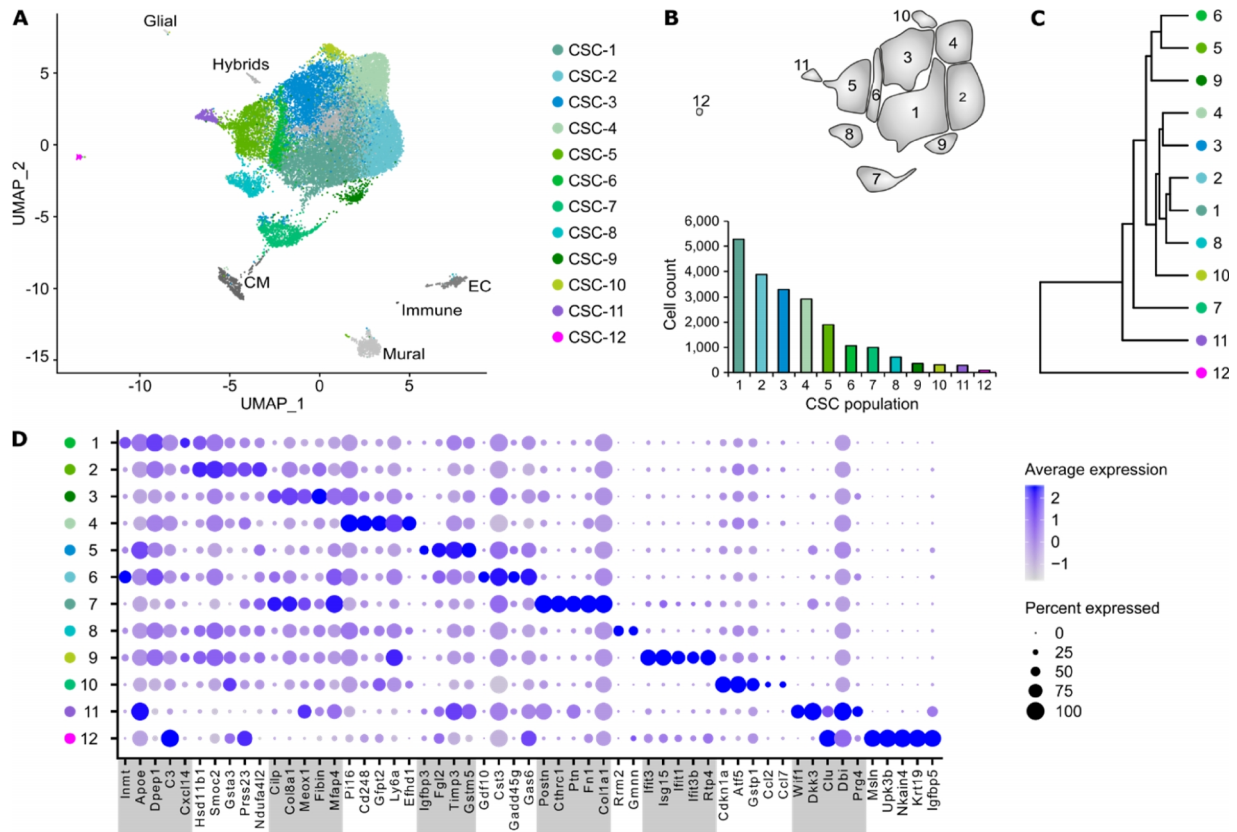

**Figure 3—figure supplement 3. Cell populations in CSC from control hearts.** (A) UMAP plot of clustered scRNAseq data of the pooled CSC fraction ( $n=24,781$  single cells). Each point represents a single cell and identified cell populations are color-coded. CM, cardiomyocytes; EC, endothelial cells. (B) Scheme of the populations from (A) and population cell counts of and CSC. (C) Dendrogram of and CSC populations according to average RNA expression. (D) Dot plot of top 5 marker genes for each CSC population.

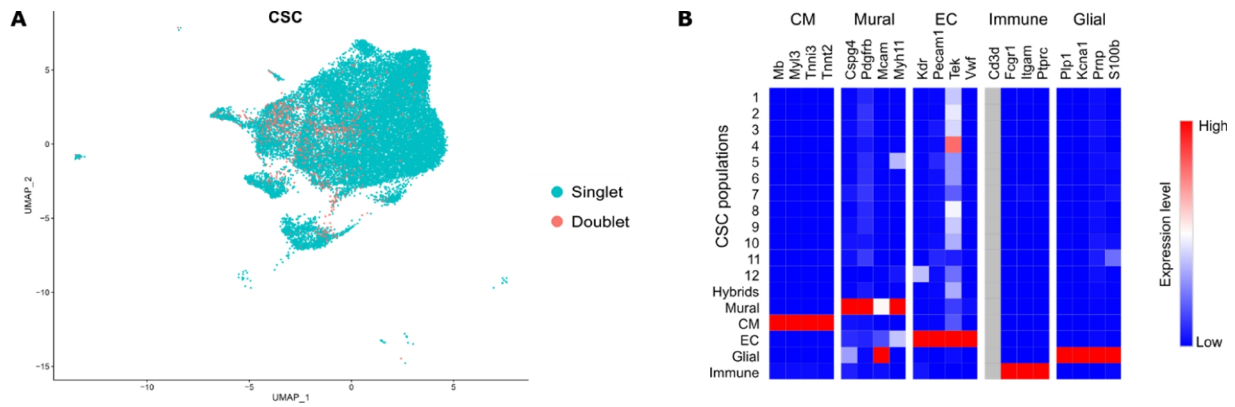

**Figure 3—figure supplement 4. Excluded hybrid and non-stromal cell populations in the CSC fraction.** (A) DoubletFinder tool was used to detect cell doublets with hybrid transcriptomes. (B) Heat map showing the expression of markers for mural cells, cardiomyocytes (CM), endothelial cells (EC), glial cells, and immune cells used to identify residual populations of non-stromal cells (grey filling, gene expression not detected).

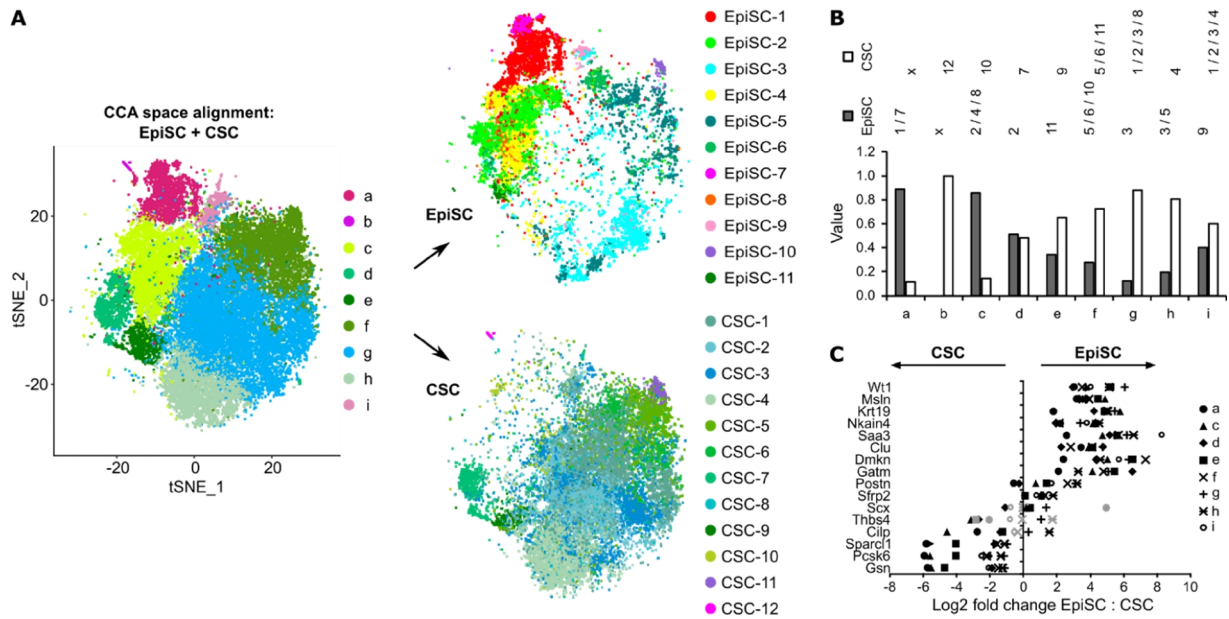

**Figure 3—figure supplement 5. Comparison of EpiSC to CSC.** (A) CCA space alignment of EpiSC and CSC scRNAseq data in one *t*-SNE plot (left) and split in one plot each (right). Cells are color-coded according to their assignment to CCA clusters (left) or previously identified populations (right). (B) Contribution of EpiSC and CSC fractions to CCA clusters. (C) Relative expression of epicardial and stromal cell markers in CSC and EpiSC fractions from non-epithelial CCA clusters C-1 as log<sub>2</sub> fold change. Black symbols p-value ≤ 0.001; grey symbols p-value > 0.001.
